# Supplementary material
Source: ML conference proceedings conference paper supplement (https://openreview.net/forum?id=tzxP9Rx0LV)
Supplement: supplementary_material [file attachment]

---

# Knowledge Distillation Performs Partial Variance Reduction

---

Anonymous Author(s)

Affiliation

Address

email

## Abstract

Knowledge distillation is a popular approach for enhancing the performance of “student” models, with lower representational capacity, by taking advantage of more powerful “teacher” models. Despite its apparent simplicity and widespread use, the underlying mechanics behind knowledge distillation (KD) are still not fully understood. In this work, we shed new light on the inner workings of this method, by examining it from an optimization perspective. We show that, in the context of linear and deep linear models, KD can be interpreted as a novel type of stochastic variance reduction mechanism. We provide a detailed convergence analysis of the resulting dynamics, which hold under standard assumptions for both strongly-convex and non-convex losses, showing that KD acts as a form of *partial variance reduction*, which can reduce the stochastic gradient noise, but may not eliminate it completely, depending on the properties of the “teacher” model. Our analysis puts further emphasis on the need for careful parametrization of KD, in particular w.r.t. the weighting of the distillation loss, and is validated empirically on both linear models and deep neural networks.

## 1 Introduction

Knowledge Distillation (KD) [13, 3] is a standard tool for transferring information between a machine learning model of lower representational capacity—usually called the *student*—and a more accurate and powerful *teacher* model. In the context of classification using neural networks, it is common to consider the student to be a *smaller* network [2], whereas the teacher is a network that is larger and more computationally-heavy, but also more accurate. Assuming a supervised classification task, distillation consists in training the student to minimize the cross-entropy with respect to the *teacher’s logits* on every given sample, in addition to minimizing the standard cross-entropy loss with respect to the ground truth labels.

Since its introduction [3], distillation has been developed and applied in a wide variety of settings, from obtaining compact high-accuracy encodings of model ensembles [14], to boosting the accuracy of compressed models [46, 36, 29], to reinforcement learning [47, 40, 33, 5, 7, 42] and learning with privileged information [48]. Given its apparent simplicity, there has been significant interest in finding explanations for the effectiveness of distillation [2, 14, 35]. For instance, one hypothesis [2, 14] is that the smoothed labels resulting from distillation present the student with a decision surface that is *easier to learn* than the one presented by the categorical (one-hot) outputs. Another hypothesis [2, 14, 48] starts from the observation that the teacher’s outputs have higher entropy than the ground truth labels, and therefore, higher information content. Despite this work, we still have a limited analytical understanding regarding *why* knowledge distillation is so effective [35]. Specifically, very little is known about the interplay between distillation and stochastic gradient descent (SGD), which is the standard optimization setting in which this method is applied.

**1.1. Contributions.** In this paper, we investigate the impact of knowledge distillation on the convergence of the “student” model when optimizing via SGD. Our approach starts from a simple

re-formulation of distillation in the context of gradient-based optimization, which allows us to connect KD to stochastic *variance reduction* techniques, such as SVRG [15], which are popular in stochastic optimization. Our results apply both to *self-distillation*, where KD is applied while training relative to an earlier version of the same model, as well as *distillation for compression*, where a compressed model leverages outputs from an uncompressed one during training.

In a nutshell, in both cases, we show that SGD with distillation preserves the convergence speed of vanilla SGD, but that the teacher’s outputs serve to reduce the gradient variance term, proportionally to the distance between the teacher model and the true optimum. Since the teacher model may not be at an optimum, this means that variance reduction is only *partial*, as distillation may not completely eliminate noise, and in fact may introduce bias or even increase variance for certain parameter values. Our analysis precisely characterizes this effect, which can be controlled by the weight of the distillation loss, and is validated empirically for both linear models and deep networks.

**1.2. Results Overview.** To illustrate our results, we consider the case of self-distillation [55], which is a popular supervised training technique in which both the student model  $x \in \mathbb{R}^d$  and the teacher model  $\theta \in \mathbb{R}^d$  have the same structure and dimensionality. The process starts from a teacher model  $\theta$  trained using regular cross-entropy loss, and then trains the student model with respect to a weighted combination of cross-entropy w.r.t. the data labels, and cross-entropy w.r.t. the teacher’s outputs. This process is often executed over multiple iterations, in the sense that the student at iteration  $k$  becomes the teacher for iteration  $k + 1$ , and so on.

Our first observation is that, in the case of self-distillation with teacher weight  $1 \geq \lambda \geq 0$ , the gradient of the distilled student model on a sample  $i$ , denoted by  $\nabla_x f_i(x \mid \theta, \lambda)$  at a given iteration can simply be written as

$$\nabla_x f_i(x \mid \theta, \lambda) \simeq \nabla f_i(x) - \lambda \nabla f_i(\theta),$$

where  $\nabla f_i(x)$  and  $\nabla f_i(\theta)$  are the student’s and teacher’s standard gradients on sample  $i$ , respectively. This expression is exact for linear models and generalized linear networks, and we provide evidence that it holds approximately for general classifiers. With this re-formulation, self-distillation can be interpreted as a truncated form of the classic SVRG iteration [15], which never employs full (non-stochastic) gradients.

Our main technical contribution is in providing convergence guarantees for iterations of this form, for both strong quasi-convex, and non-convex functions under the Polyak-Łojasiewicz (PL) condition. Our analysis covers both self-distillation (where the teacher is a partially-trained version of the same model), and more general distillation, in which the student is a compressed version of the teacher model. The convergence rates we provide are similar in nature to SGD convergence, with one key difference: the rate dependence on the *gradient variance*  $\sigma^2$  is dampened by a term depending on the gap between the teacher model and an optimum. Intuitively, this says that, if the teacher’s accuracy is poor, then distillation will not have any positive effect. However, the better-trained the teacher is, the more it can help reduce the *student’s* variance during optimization. Importantly, this effect occurs even if the teacher is *not* trained to near-zero loss, thus motivating the usefulness of the teacher in self-distillation. Our analysis highlights the importance of the *distillation weight*, as a means to maximize the positive effects of distillation: for linear models, we can even derive a closed-form solution for the optimal distillation weight. We validate our findings experimentally for both linear models and deep networks, confirming the effects predicted by the analysis.

## 2 Related Work

We now provide an overview for some of the relevant related work regarding KD. Knowledge distillation, in its current formulation, was introduced in the seminal work of [13], which showed that the predictive performance of a model can be improved if it is trained to match the soft targets produced by a large and accurate model. This observation has motivated the adoption of KD as a standard mechanism to enhance the training of neural networks in a wide range of settings, such as compression [36], learning with noisy labels [24], and has also become an essential tool in training accurate compressed versions of large models [36, 45, 50].

Despite these important practical advantages, providing a thorough theoretical justification for the mechanisms driving the success of KD has so far been elusive. Several works have focused on studying KD from different theoretical perspectives. For example, Lopez et al. [26] connected distillation with *privileged information* [48] by proposing the notion of *generalized distillation*, and presented an intuitive explanation for why generalized distillation should allow for higher

sample efficiency, relative to regular training. Phuong and Lampert [35] studied distillation from the perspective of generalization bounds in the case of linear and deep linear models. They identify three factors which influence the success of KD: (1) the geometry of the data; (2) the fact that the expected risk of the student always decreases with more data; (3) the fact that gradient descent finds a favorable minimum of the distillation objective. By contrast to all these previous references, our work studies the impact of distillation on stochastic (SGD-based) optimization.

More broadly, there has been extensive work on connecting KD with other areas in learning. Dao et al. [6] examined links between KD and semi-parametric Inference, whereas Li et al. [57] performed an empirical study on KD in the context of learning with noisy labels. Yuan et al. [54] and Sultan et al. [44] investigated the relationships between KD and label smoothing, a popular heuristic for training neural networks, showing both similarities and substantive differences. In this context, our work is the first to signal the connection between KD and variance-reduction, as well as investigating the convergence of KD in the context of stochastic optimization.

### 3 Knowledge Distillation

**3.1. Background.** Assume we are given a finite dataset  $\{(a_n, b_n) \mid n = 1, 2, \dots, N\}$ , where inputs  $a_n \in \mathcal{A}$  (e.g., vectors from  $\mathbb{R}^d$ ) and outputs  $b_n \in \mathcal{B}$  (e.g., categorical labels or real numbers). Consider a set of models  $\mathcal{F} = \{\phi_x : \mathcal{A} \rightarrow \mathcal{B} \mid x \in \mathcal{P} \subseteq \mathbb{R}^d\}$  with fixed neural network architecture parameterized by vector  $x$ . Depending on the supervised learning task and the class  $\mathcal{F}$  of models, we define a loss function  $\ell : \mathcal{B} \times \mathcal{B} \rightarrow \mathbb{R}_+$  in order to measure the performance of the model. In particular, the loss associated with a data point  $(a_n, b_n)$  and model  $\phi_x \in \mathcal{F}$  would be  $\ell(\phi_x(a_n), b_n)$ . In this framework, the standard Empirical Risk Minimization (ERM) takes the following form:

$$\min_{x \in \mathbb{R}^d} \frac{1}{N} \sum_{n=1}^N \ell(\phi_x(a_n), b_n). \quad (1)$$

In the objective above, the model  $\phi_x$  is trained to match the true outputs  $b_n$  given in the training dataset. Suppose that in addition to the true labels  $b_n$ , we have access to sufficiently well-trained and perhaps more complicated teacher model's outputs  $\Phi_\theta(a_n) \in \mathcal{B}$  for each input  $a_n \in \mathcal{A}$ . Similar to the student model  $\phi_x$ , the teacher model  $\Phi_\theta$  maps  $\mathcal{A} \rightarrow \mathcal{B}$  but can have different architecture, more layers and parameters. The fundamental question is how to exploit the additional knowledge of the teacher  $\Phi_\theta$  to facilitate the training of a more compact student model  $\phi_x$  with lower representational capacity. *Knowledge Distillation* with parameter  $\lambda \in [0, 1]$  from teacher model  $\Phi_\theta$  to student model  $\phi_x$  is the following modification to the objective (1):

$$\min_{x \in \mathbb{R}^d} \frac{1}{N} \sum_{n=1}^N \left[ (1 - \lambda) \ell(\phi_x(a_n), b_n) + \lambda \ell(\phi_x(a_n), \Phi_\theta(a_n)) \right]. \quad (2)$$

Here we customize the loss penalizing dissimilarities from the teacher's feedback  $\Phi_\theta(a_n)$  in addition to the true outputs  $b_n$ . In case of  $\ell$  is linear in the second argument (e.g., cross-entropy loss), the problem simplifies into

$$\min_{x \in \mathbb{R}^d} \frac{1}{N} \sum_{n=1}^N \ell(\phi_x(a_n), (1 - \lambda)b_n + \lambda \Phi_\theta(a_n)), \quad (3)$$

which is a standard ERM (1) with modified "soft" labels  $s_n := (1 - \lambda)b_n + \lambda \Phi_\theta(a_n)$  as the target.

**3.2. Self-distillation.** As already mentioned, the teacher's model  $\Phi_\theta$  can have more complicated neural network architecture and potentially larger parameter space  $\theta \in \mathcal{Q} \subseteq \mathbb{R}^D$ . In particular,  $\Phi_\theta$  does not have to be from the same set of models  $\mathcal{F}$  as the student model  $\phi_x$ . The special case when both the student and the teacher share the same structure/architecture is called *self-distillation* [30, 56], which is the key setup for our work. In this case, the teacher model  $\Phi_\theta \equiv \phi_\theta \in \mathcal{F}$  with  $\theta \in \mathbb{R}^d$  (i.e.,  $\mathcal{Q} = \mathcal{P}$ ,  $D = d$ ) and the corresponding distillation objective would be

$$\min_{x \in \mathbb{R}^d} \frac{1}{N} \sum_{n=1}^N \left[ (1 - \lambda) \ell(\phi_x(a_n), b_n) + \lambda \ell(\phi_x(a_n), \phi_\theta(a_n)) \right]. \quad (4)$$

Our primary focus in this work would be the objective mentioned above of self-distillation. For convenience, let  $f_n(x) := \ell(\phi_x(a_n), b_n)$  be the prediction loss with respect to the output  $b_n$ ,  $f_n(x \mid \theta) := \ell(\phi_x(a_n), \phi_\theta(a_n))$  be the loss with respect to the teacher's output probabilities and  $f_n(x \mid \theta, \lambda) := \lambda f_n(x) + (1 - \lambda) f_n(x \mid \theta)$  be the distillation loss. See Algorithm 1 for an illustration.

---

**Algorithm 1** Knowledge Distillation via SGD

---

```

1: Input: learning rate  $\gamma > 0$ , initial student model  $x^0 \in \mathcal{P} \subseteq \mathbb{R}^d$ 
2: for each distillation iteration  $m$  do
3:   choose a teacher model  $\theta^m \in \mathcal{Q} \subseteq \mathbb{R}^D$  and distillation weight  $\lambda^m \in [0, 1]$  (e.g., see Sec. 5)
4:   for each training iteration  $t$  do
5:     sample an unbiased mini-batch  $\xi \sim \mathcal{D}$  from the train set
6:     compute distillation gradient  $\nabla f_\xi(x^t | \theta^m, \lambda^m) = \lambda^m \nabla f_\xi(x^t) + (1 - \lambda^m) \nabla f_\xi(x^t | \theta^m)$ 
7:     update the student model via  $x^{t+1} = x^t - \gamma \nabla f_\xi(x^t | \theta^m, \lambda^m)$ 
8:   end for
9: end for

```

---

136 **3.3. Distillation Gradient.** As the first step towards understanding how self-distillation affects the  
137 training procedure, we analyze the modified loss landscape (4) via stochastic gradients of (1) and (4).  
138 In particular, we put forward the following proposition regarding the form of distillation gradient in  
139 terms of gradients of (1).

140 **Proposition 1** (Distillation Gradient). *For a student model  $x \in \mathbb{R}^d$ , teacher model  $\theta \in \mathbb{R}^d$  and*  
141 *distillation weight  $\lambda$ , the distillation gradient corresponding to self-distillation (4) is given by*

$$\nabla_x f_n(x | \theta, \lambda) = \nabla f_n(x) - \lambda \nabla f_n(\theta). \quad (5)$$

142 Before justifying this proposition formally, let us provide some intuition behind the expression (5)  
143 and its connection to distillation loss (4). First, the gradient expression (5) suggests that the teacher  
144 has little or no effect on the data points classified correctly with high confidence (i.e. those for which  
145  $\nabla f_n(\theta)$  is close to 0 or  $\phi_\theta(a_n)$  is close to  $b_n$ ). In other words, the more accurate the teacher is, the  
146 less it can affect the learning process. In the extreme case, a perfect or overfitted teacher (one that  
147  $\nabla f_n(\theta) = 0$  or  $\phi_\theta(a_n) = b_n$  for all  $n$ ) will have no effect. In fact, this is expected since, in this  
148 case, problems (1) and (4) coincide. Alternatively, if the teacher is not perfect, then the modified  
149 objective (4) intuitively suggests that the learning dynamics of a student model is adjusted based  
150 on the teacher’s knowledge. As we can see in (5), the adjustment from the teacher is enforced by  
151  $-\lambda \nabla f_n(\theta)$  term. It is worth mentioning that the direction of distillation gradient  $\nabla_x f_n(x | \theta, \lambda)$  can  
152 be different from the usual gradient’s direction  $\nabla f_n(x)$  due to the influence of the teacher. Thus,  
153 Proposition 1 explicitly shows how the teacher guides the student by adjusting its stochastic gradient.

154 • **Linear regression.** To support Proposition 1 rigorously, consider the simple setup of linear  
155 regression. Let  $\mathcal{A} = \mathbb{R}^d$ ,  $\mathcal{P} = \mathbb{R}^{d+1}$ ,  $\phi_x(a) = x^\top \bar{a} \in \mathbb{R}$ , where  $\bar{a} = [a \ 1]^\top \in \mathbb{R}^{d+1}$  is the input  
156 vector in the lifted space (to include the bias term),  $\mathcal{B} = \mathbb{R}$ , and the loss is defined by  $\ell(t, t') = (t - t')^2$   
157 for all  $t, t' \in \mathbb{R}$ . Thus, based on (4), we have

$$f_n(x | \theta, \lambda) = (1 - \lambda)(x^\top \bar{a}_n - b_n)^2 + \lambda(x^\top \bar{a}_n - \theta^\top \bar{a}_n)^2,$$

158 from which we compute its gradient straightforwardly as

$$\begin{aligned} \nabla_x f_n(x | \theta, \lambda) &= 2(1 - \lambda)(x^\top \bar{a}_n - b_n)\bar{a}_n + 2\lambda(x^\top \bar{a}_n - \theta^\top \bar{a}_n)\bar{a}_n \\ &= 2(x^\top \bar{a}_n - b_n)\bar{a}_n - 2\lambda(\theta^\top \bar{a}_n - b_n)\bar{a}_n = \nabla f_n(x) - \lambda \nabla f_n(\theta). \end{aligned}$$

159 Hence, the distillation gradient for linear regression tasks has the form (5).

160 • **Classification with a single hidden layer.** We can extend the above argument and derivation  
161 for a  $K$ -class classification model with one hidden layer that has soft-max as the last layer, i.e.  
162  $\phi_X(a_n) = \sigma(X^\top a_n) \in \mathbb{R}^K$ , where  $X = [x_1 \ x_2 \ \dots \ x_K] \in \mathbb{R}^{d \times K}$  are the model parameters,  
163  $a_n \in \mathcal{A} = \mathbb{R}^d$  is the input data and  $\sigma$  is the soft-max function. Then, we show in the Appendix B.2  
164 that for all  $k = 1, 2, \dots, K$  it holds

$$\nabla_{x_k} f_n(X | \Theta, \lambda) = \nabla_{x_k} f_n(X) - \lambda \nabla_{\theta_k} f_n(\Theta),$$

165 where  $\Theta = [\theta_1 \ \theta_2 \ \dots \ \theta_K] \in \mathbb{R}^{d \times K}$  are the teacher’s parameters.

166 • **Generic classification.** Proposition 1 will not hold precisely for arbitrary deep non-linear neural  
167 networks. However, careful calculations reveal that, in general, distillation gradient takes a form  
168 similar to (5). Detailed derivations are deferred to Appendix B.3, here we provide the sketch.

Consider an arbitrary neural network architecture for classification that ends with soft-max layer, i.e.  $\phi_x(a_n) = \sigma(\psi_n(x))$ , where  $a_n \in \mathcal{A}$  is the input data,  $\psi_n(x)$  are the produced logits with respect to the model parameters  $x$ , and  $\sigma$  is the soft-max function. Denote  $\varphi_n(z) := \ell(\sigma(z), b_n)$  the loss associated with logits  $z$  and the true label  $b_n$ . In words,  $\psi_n$  gives the logits from the input data, while  $\varphi_n$  computes the loss from given logits. Then, the representation for the loss function is  $f_n(x) = \varphi_n(\psi_n(x))$ . We show in Appendix B.3 that the distillation gradient can be written as

$$\nabla_x f_n(x | \theta, \lambda) = J\psi_n(x) (\nabla \varphi_n(\psi_n(x)) - \lambda \nabla \varphi_n(\psi_n(\theta))) = \frac{\partial \psi_n(x)}{\partial x} \frac{\partial f_n(x)}{\partial \psi_n(x)} - \lambda \frac{\partial \psi_n(x)}{\partial x} \frac{\partial f_n(\theta)}{\partial \psi_n(\theta)},$$

where  $J\psi_n(x) := \frac{\partial \psi_n(x)}{\partial x} = [\nabla \psi_{n,1}(x) \nabla \psi_{n,2}(x) \dots \nabla \psi_{n,K}(x)] \in \mathbb{R}^{d \times K}$  is the Jacobian of the vector-valued function  $\psi_n$  for logits. Notice that the first term  $\frac{\partial \psi_n(x)}{\partial x} \frac{\partial f_n(x)}{\partial \psi_n(x)}$  coincides with the student's gradient  $\nabla_x f_n(x) = \frac{\partial f_n(x)}{\partial x}$ . However, the second term  $\frac{\partial \psi_n(x)}{\partial x} \frac{\partial f_n(\theta)}{\partial \psi_n(\theta)}$  differs from the teacher's gradient as the partial derivatives of logits are with respect to the student model.

Despite these differences in the case of deep non-linear models, we observe that the distillation gradient defined by Equation 5 can approximate well the true distillation gradient from Equation 3. Specifically, we consider a fully connected neural network with one hidden layer and ReLU activation [31], trained on the MNIST dataset [22], using regular self-distillation, from an SGD-teacher, with a fixed learning rate, and SGD with weight decay and no momentum. At each training iteration we compute the cosine similarity between the gradient of the distillation loss and the approximation from Equation 5, and we average the results across each epoch. The results presented in Figure 1 show that the distillation gradient approximates well the true distillation gradient. Moreover, the behavior is monotonic in the distillation weight  $\lambda$  (higher similarity for smaller  $\lambda$ ), as predicted by the analysis above, and it stabilizes as training progresses.

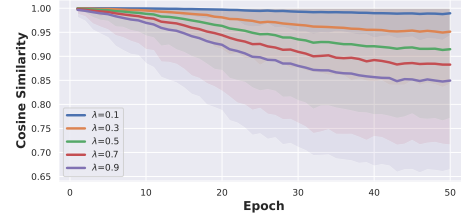

Figure 1: Cosine similarity between the true and approximated distillation gradient for a neural network during training. As predicted, larger  $\lambda$  leads to larger differences, although gradients remain well-correlated.

## 4 Convergence Theory for Self-Distillation

**4.1. Optimization Setup and Assumptions.** We abstract the standard ERM problem (1) into a stochastic optimization problem of the form

$$\min_{x \in \mathbb{R}^d} \left\{ f(x) := \mathbb{E}_{\xi \sim \mathcal{D}} [f_\xi(x)] \right\}, \quad (6)$$

where  $f_\xi(x)$  is the loss associated with data sample  $\xi \sim \mathcal{D}$  given model parameters  $x \in \mathbb{R}^d$ . For instance, if  $\xi = (a_n, b_n)$  is a single data point, then the corresponding loss is  $f_\xi(x) = \ell(\phi_x(a_n), b_n)$ . The goal is to find parameters  $x$  minimizing the risk  $f(x)$ . To solve the problem (6), we employ *Stochastic Gradient Descent (SGD)*. Based on Section 3, applying SGD to the problem (6) with self-distillation amounts to the following optimization updates in the parameter space:

$$x^{t+1} = x^t - \gamma (\nabla f_\xi(x^t) - \lambda \nabla f_\xi(\theta)), \quad (7)$$

with initialization  $x^0 \in \mathbb{R}^d$ , step size or learning rate  $\gamma > 0$ , teacher model's parameters  $\theta \in \mathbb{R}^d$  and distillation weight  $\lambda$ . To analyze the convergence behavior of iterates (7), we need to impose some assumptions in order to derive reasonable convergence guarantees. First, we assume that the problem (6) has a non-empty solution set  $\mathcal{X} \neq \emptyset$  and  $f^* := f(x^*)$  for some minimizer  $x^* \in \mathcal{X}$ .

**Assumption 1** (Strong quasi-convexity). *The function  $f: \mathbb{R}^d \rightarrow \mathbb{R}$  is differentiable and  $\mu$ -strongly quasi-convex for some constant  $\mu > 0$ , i.e., for any  $x \in \mathbb{R}^d$  it holds*

$$f(x^*) \geq f(x) + \langle \nabla f(x), x^* - x \rangle + \frac{\mu}{2} \|x^* - x\|^2. \quad (8)$$

Strong quasi-convexity [9] is a weaker version of strong convexity [32], which assumes that the quadratic lower bound above holds for at every point  $y \in \mathbb{R}^d$  instead of  $x^* \in \mathcal{X}$ . Notice that strong quasi-convexity implies that the minimizer  $x^*$  is unique<sup>1</sup>. A more relaxed version of this assumption is the Polyak-Łojasiewicz (PL) condition [37].

<sup>1</sup>If  $f(x^*) = f(x^{**})$ , then  $\frac{\mu}{2} \|x^* - x^{**}\|^2 \leq f(x^*) - f(x^{**}) = 0$ . Hence,  $x^* = x^{**}$ .

214 **Assumption 2** (Polyak-Łojasiewicz condition). *Function  $f: \mathbb{R}^d \rightarrow \mathbb{R}$  is differentiable and satisfies*  
 215 *PL condition with parameter  $\mu > 0$ , if for any  $x \in \mathbb{R}^d$  it holds*

$$\|\nabla f(x)\|^2 \geq 2\mu(f(x) - f^*). \quad (9)$$

216 Note that the requirement imposed by the PL condition above is weaker than by strong convexity.  
 217 Functions satisfying PL condition do not have to be convex and can have multiple minimizers [16].  
 218 We make use of the following form of smoothness assumption on the stochastic gradient commonly  
 219 referred to as *expected smoothness* in the optimization literature [11, 10, 18].

220 **Assumption 3** (Expected Smoothness). *Functions  $f_\xi(x)$  are differentiable and  $\mathcal{L}$ -smooth in expectation with respect to subsampling  $\xi \sim \mathcal{D}$ , i.e., for any  $x \in \mathbb{R}^d$  it holds*

$$\mathbb{E}_{\xi \sim \mathcal{D}} [\|\nabla f_\xi(x) - \nabla f_\xi(x^*)\|^2] \leq 2\mathcal{L}(f(x) - f^*) \quad (10)$$

222 for some constant  $\mathcal{L} = \mathcal{L}(f, \mathcal{D})$ .

223 The expected smoothness condition above is a joint property of loss function  $f$  and data subsampling  
 224 strategy from the distribution  $\mathcal{D}$ . In particular, it subsumes the smoothness condition for  $f(x)$  since  
 225 (10) also implies  $\|\nabla f(x) - \nabla f(x^*)\|^2 \leq 2\mathcal{L}(f(x) - f^*)$  for any  $x \in \mathbb{R}^d$ . We denote by  $L$  the  
 226 smoothness constant of  $f(x)$  and notice that  $L \leq \mathcal{L}$ .

227 **4.2. Convergence Theory and Partial Variance Reduction.** Equipped with the assumptions  
 228 described in the previous part, we now present our convergence guarantees for the iterates (7) for  
 229 both strong quasi-convex and PL loss functions.

230 **Theorem 1** (See Appendix C.2). *Let Assumptions 1 and 3 hold. For any  $\gamma \leq \frac{1}{8\mathcal{L}}$  and properly*  
 231 *chosen distillation weight  $\lambda$ , the iterates (7) of SGD with self-distillation using teacher's parameters*  
 232  *$\theta$  converge as*

$$\mathbb{E} [\|x^t - x^*\|^2] \leq (1 - \gamma\mu)^t \|x^0 - x^*\|^2 + \frac{2\sigma_*^2}{\mu} \min(\gamma, \mathcal{O}(f(\theta) - f^*)), \quad (11)$$

233 where  $\sigma_*^2 := \mathbb{E}[\|\nabla f_\xi(x^*)\|^2]$  is the stochastic noise at the optimum.

234 **Theorem 2** (See Appendix C.3). *Let Assumptions 2 and 3 hold. For any  $\gamma \leq \frac{1}{4\mathcal{L}} \frac{\mu}{L}$  and properly*  
 235 *chosen distillation weight  $\lambda$ , the iterates (7) of SGD with self-distillation using teacher's parameters*  
 236  *$\theta$  converge as*

$$\mathbb{E} [f(x^t) - f^*] \leq (1 - \gamma\mu)^t (f(x^0) - f^*) + \frac{L\sigma_*^2}{\mu} \min(\gamma, \mathcal{O}(f(\theta) - f^*)), \quad (12)$$

237 *Proof overview.* Both proofs follow similar steps and can be divided into three logical parts.

238 *Part 1 (Descent inequality).* Generally, an integral part of essentially any convergence theory for  
 239 optimization methods is a descent inequality quantifying the progress of an algorithm in one iteration.  
 240 Our theory is not an exception: we first define our “potential”  $e^t = \|x^t - x^*\|^2$  for the strongly  
 241 quasi-convex setup, and  $e^t = f(x^t) - f^*$  for the PL setup. Then, we start our derivations by bounding  
 242  $\mathbb{E}_t[e^{t+1}] - (1 - \gamma\mu)e^t$ . Here,  $\mathbb{E}_t$  is the conditional expectation with respect the randomness of  
 243 previous iterate  $x^t$ . Specifically, up to constants, both setups allow the following bound:

$$\mathbb{E}_t[e^{t+1}] \leq (1 - \gamma\mu)e^t - \mathcal{O}(\gamma)(1 - \mathcal{O}(\gamma))(f(x^t) - f^*) + \mathcal{O}(\gamma)N(\lambda), \quad (13)$$

244 where  $N(\lambda) = \lambda^2 \|\nabla f(\theta)\|^2 + \gamma \mathbb{E} [\|\nabla f_\xi(x^*) - \lambda \nabla f_\xi(\theta)\|^2]$ . Choosing the learning rate  $\gamma$  to be  
 245 small enough, we ensure that the second term is non-positive and hence negligible in the upper bound.

246 *Part 2 (Optimal distillation weight).* Next, we focus our attention on the third term in (13) involving  
 247 the iteration-independent neighborhood term  $N(\lambda)$ . Note that the  $\mathcal{O}(\gamma)$  factor next to  $N(\lambda)$  will be  
 248 absorbed once we unfold the recursion (13) up to initial iterate. Hence, the convergence neighborhood  
 249 is proportional to  $N(\lambda)$ . Now the question is how small this term can get if we properly tune  
 250 the parameter  $\lambda$ . Notice that  $N(0) = \gamma\sigma_*^2$  corresponds to the neighborhood size for plain SGD  
 251 without any distillation involved. Luckily, due to the quadratic dependence, we can minimize  $N(\lambda)$   
 252 analytically with respect to  $\lambda$  and find the optimal value

$$\lambda_* = \frac{\mathbb{E}[\langle \nabla f_\xi(x^*), \nabla f_\xi(\theta) \rangle]}{\mathbb{E}[\|\nabla f_\xi(\theta)\|^2] + \frac{1}{\gamma} \|\nabla f(\theta)\|^2}. \quad (14)$$

253 Consequently, the analysis puts further emphasis on the need for careful parametrization with respect  
 254 to the weighting  $\lambda$  of the distillation loss as there exists a particularly privileged value  $\lambda_*$ .

255 *Part 3 (Impact of the teacher).* In the final step, we quantify the impact of the teacher on the reduction  
 256 in the neighborhood term  $N(\lambda_*)$  compared to the plain SGD neighborhood  $N(0)$ . Via algebraic  
 257 transformations, we show that

$$\frac{N(\lambda_*)}{N(0)} = 1 - \rho^2(x^*, \theta) \frac{1 - \beta(\theta)}{1 + \frac{1}{\gamma} \beta(\theta)}, \quad (15)$$

258 where  $\beta(\theta) = \|\nabla f(\theta)\|^2 / \mathbb{E}[\|\nabla f_\xi(\theta)\|^2] \in [0, 1]$  is the signal-to-noise ratio, and  $\rho(x^*, \theta) \in [-1, 1]$   
 259 is the correlation coefficient between stochastic gradients  $\nabla f_\xi(x^*)$  and  $\nabla f_\xi(\theta)$ . This representation  
 260 gives us analytical means to measure the impact of the teacher. For instance, the optimal teacher  $\theta =$   
 261  $x^*$  satisfies  $\rho(x^*, \theta) = 1$  and  $\beta(\theta) = 0$ , and thus  $N(\lambda_*) = 0$ . In general, if the teacher is not optimal,  
 262 then the reduction (15) is of order  $\frac{1}{\gamma} \mathcal{O}(f(\theta) - f^*)$  and  $N(\lambda_*) = \sigma_*^2 \min(\gamma, \mathcal{O}(f(\theta) - f^*))$ .  $\square$

263 We discuss these results highlighting the key aspects and significance.

264 • **Structure of the rates.** The structure of these two convergence rates is typical in gradient-based  
 265 stochastic optimization literature: linear convergence up to some neighborhood controlled by the  
 266 stochastic noise term  $\sigma_*^2$  and learning rate  $\gamma$ . In fact, these results (including learning rate restrictions)  
 267 are identical to ones for SGD [8] except the non-vanishing terms in (11) and (12) include an additional  
 268  $\mathcal{O}(f(\theta) - f^*)$  factor due to distillation and proper selection of weight parameter  $\lambda$ .

269 • **Importance of the results.** First, observe that in the worst case when the teacher’s parameters  
 270 are trained inadequately (or not trained at all), that is  $\mathcal{O}(f(\theta) - f^*) \geq \gamma$ , then the obtained rates  
 271 recover the known results for plain SGD. However, the crucial benefit of these results is to show that  
 272 a sufficiently well-trained teacher, i.e.  $\mathcal{O}(f(\theta) - f^*) < \gamma$ , provably reduces the neighborhood size of  
 273 SGD without slowing down the speed of convergence. In the best case scenario, when the teacher’s  
 274 model is perfectly trained, namely  $f(\theta) = f^*$ , then the neighborhood term vanishes, and the method  
 275 converges to the exact solution (see SGD-star Algorithm 4 in [9]). Thus, self-distillation in the form  
 276 of iterates (7) acts as a form of *partial variance reduction*, which can reduce the stochastic gradient  
 277 noise, but may not eliminate it completely, depending on the properties of the teacher model.

278 • **Choice of distillation weight  $\lambda$ .** As we discussed in the proof sketch above, our analysis reveals  
 279 that the performance of distillation is optimized for a specific value (14) of distillation weight  $\lambda_*$   
 280 depending on the teacher model. One way to interpret the expression (14) for weight parameter  
 281 intuitively is that the better the teacher’s model  $\theta$  is, the bigger  $\lambda_* \leq 1$  gets. In other words,  $\lambda_*$   
 282 quantifies the quality of the teacher:  $\lambda_* \approx 0$  indicates a poor teacher model ( $f(\theta) \gg f^*$ ) and  $\lambda_* = 1$   
 283 is for the optimal teacher ( $f(\theta) = f^*$ ).

284 **4.3. Experimental Validation.** In this section we illustrate that our theoretical analysis in the convex  
 285 case also holds empirically. Specifically, we consider classification problems using linear models in  
 286 two different setups: training a linear model on the MNIST dataset [22] and linear probing on the  
 287 CIFAR-10 dataset [21], using a ResNet50 model [12], pre-trained on the ImageNet dataset [39]. In  
 288 both cases we train using SGD without momentum and regularization, with a fixed learning rate and  
 289 mini-batch of size 10, for a total of 100 epochs. The models trained with SGD are compared against  
 290 self-distillation (Equation 7), using the same training hyper-parameters, where the teacher is the  
 291 model trained with SGD. In the case of CIFAR-10 features, we also consider the “optimal” teacher,  
 292 which is a model trained with L-BFGS [25]. We perform all experiments using multiple values of the  
 293 distillation parameter  $\lambda$  and measure the cross entropy loss between student and true labels. At each  
 294 training epoch we computing the running average over all mini-batch losses seen during that epoch.

295 The results presented in Figure 2 show the minimum cross entropy train loss obtained over 100  
 296 epochs, as well as the average over the last 10 epochs, for models trained with SGD, as well as with  
 297 self-distillation, with  $\lambda \in [0.01, 1]$ . We observe that when the teacher is the model trained with SGD  
 298 ( $\lambda = 0$ ), there exists a  $\lambda > 0$  which achieves a lower training loss than SGD, which is in line with  
 299 our statement from Theorem 1. Furthermore, when the teacher is very close to the optimum,  $\lambda$  closer  
 300 to 1 reduces the training loss the most compared to SGD, which is also in line with the theory (see  
 301 Theorem 1). This behavior is illustrated in Figure 2b, when using an L-BFGS teacher.

## 302 5 Removing Bias and Improving Variance Reduction

303 In this section, we investigate the cause of having variance reduction only partially and suggest a  
 304 possible workaround to obtain complete variance reduction. In brief, the potential source of *partial*  
 305 variance reduction is the biased nature of distillation. Essentially, distillation bias is reflected in the

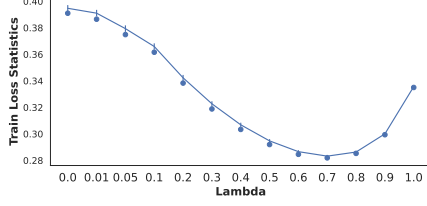

(a) Self-distillation on MNIST.

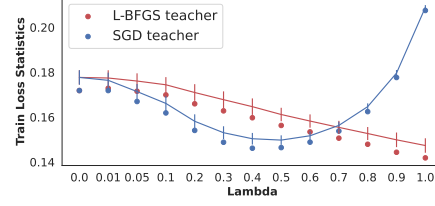

(b) Self-distillation on CIFAR-10.

Figure 2: The minimum training loss, and average over the last 10 epochs, for models trained with SGD and with self-distillation, using different values of the distillation parameter  $\lambda$ , on MNIST and CIFAR-10. SGD is equivalent to  $\lambda = 0$ . The curves for the SGD-based teachers (which do not have zero loss) reflect our analysis, corroborating the existence of the “optimal” distillation weight. By contrast, in the L-BFGS teacher, higher distillation weight always leads to lower loss.

iterates (7) since the expected update direction  $\mathbb{E} [\nabla f_{\xi}(x^t) - \lambda \nabla f_{\xi}(\theta) \mid x^t] = \nabla f(x^t) - \lambda \nabla f(\theta)$  can be different from  $\nabla f(x^t)$ . This comes from the fact that distillation loss (4) modifies the initial loss (1) composed of true outputs. To make our argument compelling, next we correct the bias by adding  $\lambda \nabla f(\theta)$  to iterates (7) and analyze the following dynamics:

$$x^{t+1} = x^t - \gamma(\nabla f_{\xi}(x^t) - \lambda \nabla f_{\xi}(\theta) + \lambda \nabla f(\theta)). \quad (16)$$

Besides making the estimate unbiased, the advantage of this adjustment is that no tuning is required for the distillation weight  $\lambda$ ; we may simply set  $\lambda = 1$ . The obvious disadvantage is that  $\nabla f(\theta)$  is the batch gradient over the whole train data that can be very costly to compute. However, we could compute it once and reuse it for all further iterates. The resulting iteration is similar to the popular and well-studied SVRG [15, 53, 38, 19, 23, 20, 27] method, and therefore iterates (16) will enjoy full variance reduction.

**Theorem 3** (See Appendix D). *Let Assumptions 2 and 3 hold. Then for any  $\gamma \leq \frac{\mu}{3L\mathcal{L}}$  the iterates (16) with  $\lambda = 1$  converge as*

$$\mathbb{E}_t [f(x^t) - f^*] \leq (1 - \gamma\mu)^t (f(x^0) - f^*) + \frac{3L(L+\mathcal{L})}{\mu} \cdot \gamma (f(\theta) - f^*). \quad (17)$$

The key improvement that bias correction brings in (17) is the convergence up to a neighborhood  $\mathcal{O}(\gamma(f(\theta) - f^*))$  in contrast to  $\min(\gamma, \mathcal{O}(f(\theta) - f^*))$  as in (11) and (12). The multiplicative dependence of learning rate and the quality of the teacher leads the method (16) to full variance reduction. Indeed, if we choose the teacher model as  $\theta = x^0$ , then the rate (17) becomes

$$\mathbb{E} [f(x^t) - f^*] \leq [(1 - \gamma\mu)^t + \gamma \cdot 3L(L + \mathcal{L})/\mu] (f(x^0) - f^*) \leq \frac{1}{2} (f(x^0) - f^*),$$

provided sufficiently small step-size  $\gamma \leq \frac{\mu}{12L\mathcal{L}}$  and enough training iterations  $t = \mathcal{O}(1/\gamma\mu)$ . Hence, following SVRG and updating the teacher model in every  $\tau = \mathcal{O}(1/\gamma\mu)$  training iterations, that is choosing  $\theta^m = x^{m\tau}$  as the teacher at the  $m^{\text{th}}$  distillation iteration (see line 3 of Algorithm 1), we have

$$\mathbb{E} [f(x^{m\tau}) - f^*] \leq \frac{1}{2} (f(x^{(m-1)\tau}) - f^*) \leq \frac{1}{2^m} (f(x^0) - f^*).$$

Thus, we need  $\mathcal{O}(\log \frac{1}{\epsilon})$  bias-corrected distillation iteration phases, each with  $\tau = \mathcal{O}(1/\gamma\mu)$  training iterates, to get  $\epsilon$  accuracy in function value. Overall, this amounts to  $\mathcal{O}(\frac{1}{\gamma\mu} \log \frac{1}{\epsilon})$  iterations of (16).

**Experimental Validation.** Similarly to the previous section, we further validate empirically the result from Theorem 3. Specifically, we consider the convex setup described before, where we train linear models on features extracted on the CIFAR-10 dataset. Based on Figure 2b, we select  $\lambda = 0.4$  achieving the largest reduction in train loss, compared to SGD, and we additionally perform unbiased self-distillation (Equation 16), using the same

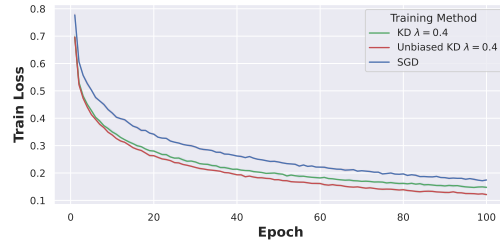

Figure 3: The train loss of self-distillation, unbiased self-distillation and vanilla SGD training.



training hyperparameters. Similar to the setup from Figure 2, we measure the cross entropy train loss of the student and with the true labels, which is computed at each epoch by averaging the mini-batch losses. The results are averaged over three runs and presented in Figure 3; they show that, indeed, the unbiased self-distillation update further reduces the training loss, compared to the update from Equation 7.

## 6 Convergence for Distillation of Compressed Models

So far, the theory we have presented is for self-distillation, i.e., the teacher’s and student’s architectures are identical. To understand the impact of knowledge distillation, we relax this requirement and allow the student’s model to be a sub-network of the larger and more powerful teacher’s model. Our approach to model this relationship between the student and the teacher is to view the student as a masked or, in general, compressed version of the teacher. Hence, as an extension to (7) we analyze the following dynamics of distillation with compressed iterates:

$$x^{t+1} = \mathcal{C}(x^t - \gamma(\nabla f_\xi(x^t) - \lambda \nabla f_\xi(\theta))), \quad (18)$$

where student’s parameters are additionally compressed in each iteration using an unbiased compression operator defined below.

**Assumption 4.** *The compression operator  $\mathcal{C} : \mathbb{R}^d \rightarrow \mathbb{R}^d$  is unbiased and there exists finite  $\omega \geq 0$  bounding the compression variance, i.e., for all  $x \in \mathbb{R}^d$  we have*

$$\mathbb{E}[\mathcal{C}(x)] = x, \quad \mathbb{E}[\|\mathcal{C}(x) - x\|^2] \leq \omega \|x\|^2. \quad (19)$$

Typical examples of compression operators satisfying conditions (19) are sparsification [51, 43] and quantization [1, 52], which are heavily used in the context of communication efficient distributed optimization and federated learning [28, 41, 34, 49]. In this context, we obtain the following:

**Theorem 4** (See Appendix E). *Let smoothness Assumption 3 hold and  $f$  be  $\mu$ -strongly convex. Choose any  $\gamma \leq \frac{1}{16L}$  and compression operator with variance parameter  $\omega = \mathcal{O}(\mu/L)$ . Then, properly selecting distillation weight  $\lambda$ , the iterates (18) satisfy*

$$\mathbb{E}[\|x^t - x^*\|^2] \leq \mathcal{O}(\omega + 1) \left[ (1 - \gamma\mu)^t \|x^0 - x^*\|^2 + \frac{\omega\mathcal{L}}{\mu} \|x^*\|^2 + \frac{\sigma_*^2}{\mu} \min(\gamma, \mathcal{O}(f(\theta) - f^*)) \right].$$

Clearly, there are several factors influencing the speed of the rate and the neighborhood of the convergence that require some discussion. First of all, choosing the identity map as a compression operator ( $\mathcal{C}(x) = x$  for all  $x \in \mathbb{R}^d$ ), we recover the same rate (11) as before ( $\omega = 0$  in this case). Next, consider the case when the stochastic noise at the optimum vanishes ( $\sigma_*^2 = 0$ ) and distillation is switched off ( $\lambda = 0$ ) in (18). In this case, the convergence is still up to some neighborhood proportional to  $\|x^*\|^2$  since compression is applied to the iterates. Intuitively, the neighborhood term  $\mathcal{O}(\|x^*\|^2)$  corresponds to the compression noise at the optimum  $x^*$  ((19) when  $x = x^*$ ). Also note that the presence of this non-vanishing term  $\mathcal{O}(\|x^*\|^2)$  and the variance restriction  $\omega = \mathcal{O}(\mu/L)$  is consistent with the prior work [17].

So, the convergence neighborhood of iterates (18) has two terms, one from each source of randomness: compression noise/variance  $\mathcal{O}(\|x^*\|^2)$  at the optimum and stochastic noise/variance  $\mathcal{O}(\sigma_*^2)$  at the optimum. Therefore, in this case as well, distillation with a properly chosen weight parameter (partially) reduces the stochastic variance of sub-sampling.

## 7 Discussion and Future Work

Our work has provided a new interpretation of knowledge distillation, examining this mechanism for the first time from the point of view of optimization. Specifically, we have shown that knowledge distillation acts as a form of partial variance reduction, whose strength depends on the characteristics of the teacher model. This finding holds across several variants of distillation, such as self-distillation and distillation of compressed models, as well as across various families of objective functions. One interesting direction of future work would be to investigate further connections with more complex variance-reduction methods, e.g. [4], which may yield even better-performing variants of KD.

## References

- [1] Dan Alistarh, Demjan Grubic, Jerry Li, Ryota Tomioka, and Milan Vojnovic. QSGD: Communication-efficient SGD via gradient quantization and encoding. In *Advances in Neural Information Processing Systems 30*, pages 1709–1720, 2017.
- [2] Lei Jimmy Ba and Rich Caruana. Do deep nets really need to be deep? *CoRR*, abs/1312.6184, 2013.
- [3] C. Buciluă, R. Caruana, and A. Niculescu-Mizil. Model compression. *Proceedings of the 12th ACM SIGKDD International Conference on Knowledge Discovery and Data Mining, KDD '06*, pages 535–541, New York, NY, USA, 2006.
- [4] Ashok Cutkosky and Francesco Orabona. Momentum-based variance reduction in non-convex SGD. *Advances in Neural Information Processing Systems*, 32, 2019.
- [5] Wojciech Czarnecki, Siddhant Jayakumar, Max Jaderberg, Leonard Hasenclever, Yee Whye Teh, Nicolas Heess, Simon Osindero, and Razvan Pascanu. Mix & match agent curricula for reinforcement learning. In *Proceedings of the 35th International Conference on Machine Learning*, 2018.
- [6] Tri Dao, Govinda M Kamath, Vasilis Syrgkanis, and Lester Mackey. Knowledge Distillation as Semiparametric Inference. *International Conference on Learning Representations (ICLR)*, 2021.
- [7] Alexandre Galashov, Siddhant Jayakumar, Leonard Hasenclever, Dhruva Tirumala, Jonathan Schwarz, Guillaume Desjardins, Wojtek M. Czarnecki, Yee Whye Teh, Razvan Pascanu, and Nicolas Heess. Information asymmetry in KL-regularized RL. In *International Conference on Learning Representations*, 2019.
- [8] Guillaume Garrigos and Robert M Gower. Handbook of convergence theorems for (stochastic) gradient methods. *arXiv preprint arXiv:2301.11235*, 2023.
- [9] Eduard Gorbunov, Filip Hanzely, and Peter Richtárik. A Unified Theory of SGD: Variance Reduction, Sampling, Quantization and Coordinate Descent. *23rd International Conference on Artificial Intelligence and Statistics (AISTATS)*, 2020.
- [10] R.M. Gower, P. Richtárik, and F. Bach. Stochastic quasi-gradient methods: variance reduction via Jacobian sketching. *Math. Program.* 188, pages 135–192, 2021.
- [11] Robert Mansel Gower, Nicolas Loizou, Xun Qian, Alibek Sailanbayev, Egor Shulgin, and Peter Richtárik. SGD: General Analysis and Improved Rates. *Proceedings of the 36th International Conference on Machine Learning*, 2019.
- [12] Kaiming He, Xiangyu Zhang, Shaoqing Ren, and Jian Sun. Deep residual learning for image recognition. *Conference on Computer Vision and Pattern Recognition*, 2016.
- [13] G. Hinton, O. Vinyals, and J. Dean. Distilling the knowledge in a neural network. *Deep Learning Workshop at NIPS*, 2014.
- [14] G. Hinton, O. Vinyals, and J. Dean. Distilling the Knowledge in a Neural Network. *ArXiv e-prints*, March 2015.
- [15] Rie Johnson and Tong Zhang. Accelerating stochastic gradient descent using predictive variance reduction. *Advances in Neural Information Processing Systems*, 26, 2013.
- [16] Hamed Karimi, Julie Nutini, and Mark Schmidt. Linear Convergence of Gradient and Proximal-Gradient Methods Under the Polyak-Łojasiewicz Condition. *arXiv:1608.04636*, 2020.
- [17] Ahmed Khaled and Peter Richtárik. Gradient descent with compressed iterates. *arXiv preprint arXiv:1909.04716*, 2019.
- [18] Ahmed Khaled and Peter Richtárik. Better Theory for SGD in the Nonconvex World. *Transactions on Machine Learning Research*, 2023.

- [19] Jakub Končný and Peter Richtárik. Semi-Stochastic Gradient Descent Methods. *Frontiers in Applied Mathematics and Statistics* 3:9, 2017.
- [20] Dmitry Kovalev, Samuel Horváth, and Peter Richtárik. Don’t jump through hoops and remove those loops: SVRG and Katyusha are better without the outer loop. *31st International Conference on Learning Theory (ALT)*, 2020.
- [21] Alex Krizhevsky, Geoffrey Hinton, et al. Learning multiple layers of features from tiny images. *CiteSeer*, 2009.
- [22] Yann LeCun and Corinna Cortes. MNIST handwritten digit database. <http://yann.lecun.com/exdb/mnist/>, 2010.
- [23] Lihua Lei, Cheng Ju, Jianbo Chen, and Michael I. Jordan. Non-Convex Finite-Sum Optimization Via SCSG Methods. *31st Conference on Neural Information Processing Systems (NIPS)*, 2017.
- [24] Yuncheng Li, Jianchao Yang, Yale Song, Liangliang Cao, Jiebo Luo, and Li-Jia Li. Learning from noisy labels with distillation. In *2017 IEEE International Conference on Computer Vision (ICCV)*, pages 1928–1936. IEEE, 2017.
- [25] Dong C Liu and Jorge Nocedal. On the limited memory bfgs method for large scale optimization. *Mathematical programming*, 45(1):503–528, 1989.
- [26] David Lopez-Paz, Léon Bottou, Bernhard Schölkopf, and Vladimir Vapnik. Unifying distillation and privileged information. *arXiv preprint arXiv:1511.03643*, 2015.
- [27] Grigory Malinovsky, Alibek Sailanbayev, and Peter Richtárik. Random reshuffling with variance reduction: new analysis and better rates. *39th Conference on Uncertainty in Artificial Intelligence (UAI)*, 2023.
- [28] Iliia Markov, Adrian Vladu, Qi Guo, and Dan Alistarh. Quantized Distributed Training of Large Models with Convergence Guarantees. *arXiv preprint arXiv:2302.02390*, 2023.
- [29] Asit Mishra and Debbie Marr. Apprentice: Using knowledge distillation techniques to improve low-precision network accuracy. *arXiv preprint arXiv:1711.05852*, 2017.
- [30] Hossein Mobahi, Mehrdad Farajtabar, and Peter L. Bartlett. Self-Distillation Amplifies Regularization in Hilbert Space. *34th Conference on Neural Information Processing Systems (NeurIPS)*, 2020.
- [31] Vinod Nair and Geoffrey E Hinton. Rectified linear units improve restricted boltzmann machines. In *International Conference on Machine Learning*, 2010.
- [32] Yurii Nesterov. *Introductory lectures on convex optimization: A basic course*, volume 87. Springer Science & Business Media, 2013.
- [33] Emilio Parisotto, Jimmy Lei Ba, and Ruslan Salakhutdinov. Actor-mimic: Deep multitask and transfer reinforcement learning. In *International Conference on Learning Representations*, 2016.
- [34] Constantin Philippenko and Aymeric Dieuleveut. Preserved central model for faster bidirectional compression in distributed settings. *35th Advances in Neural Information Processing Systems*, 2021.
- [35] Mary Phuong and Christoph Lampert. Towards understanding knowledge distillation. In Kamalika Chaudhuri and Ruslan Salakhutdinov, editors, *Proceedings of the 36th International Conference on Machine Learning*, volume 97 of *Proceedings of Machine Learning Research*, pages 5142–5151, Long Beach, California, USA, 09–15 Jun 2019. PMLR.
- [36] Antonio Polino, Razvan Pascanu, and Dan Alistarh. Model compression via distillation and quantization. *International Conference on Learning Representations (ICLR)*, 2018.
- [37] B. T. Polyak. Gradient methods for minimizing functionals (in Russian). *Zh. Vychisl. Mat. Mat. Fiz.*, pages 643–653, 1963.

- [38] Sashank J. Reddi, Ahmed Hefny, Suvrit Sra, Barnabas Poczos, and Alex Smola. Stochastic Variance Reduction for Nonconvex Optimization. *Proceedings of the 33rd International Conference on Machine Learning*, 2016.
- [39] Olga Russakovsky, Jia Deng, Hao Su, Jonathan Krause, Sanjeev Satheesh, Sean Ma, Zhiheng Huang, Andrej Karpathy, Aditya Khosla, Michael Bernstein, et al. ImageNet large scale visual recognition challenge. *IJCV*, 115(3):211–252, 2015.
- [40] Andrei A Rusu, Sergio Gomez Colmenarejo, Caglar Gulcehre, Guillaume Desjardins, James Kirkpatrick, Razvan Pascanu, Volodymyr Mnih, Koray Kavukcuoglu, and Raia Hadsell. Policy distillation. In *International Conference on Learning Representations*, 2016.
- [41] Mher Safaryan, Filip Hanzely, and Peter Richtárik. Smoothness Matrices Beat Smoothness Constants: Better Communication Compression Techniques for Distributed Optimization. In *35th Conference on Neural Information Processing Systems*, 2021.
- [42] Simon Schmitt, Jonathan J Hudson, Augustin Zidek, Simon Osindero, Carl Doersch, Wojciech M Czarnecki, Joel Z Leibo, Heinrich Kuttler, Andrew Zisserman, Karen Simonyan, et al. Kickstarting deep reinforcement learning. *arXiv preprint arXiv:1803.03835*, 2018.
- [43] Sebastian U Stich, Jean-Baptiste Cordonnier, and Martin Jaggi. Sparsified SGD with memory. In S. Bengio, H. Wallach, H. Larochelle, K. Grauman, N. Cesa-Bianchi, and R. Garnett, editors, *Advances in Neural Information Processing Systems 31*, pages 4452–4463. Curran Associates, Inc., 2018.
- [44] Md Arafat Sultan. Knowledge Distillation  $\approx$  Label Smoothing: Fact or Fallacy? *arXiv preprint arXiv:2301.12609*, 2023.
- [45] Zhiqing Sun, Hongkun Yu, Xiaodan Song, Renjie Liu, Yiming Yang, and Denny Zhou. Mobilebert: a compact task-agnostic bert for resource-limited devices. In *Proceedings of the 58th Annual Meeting of the Association for Computational Linguistics*, pages 2158–2170, 2020.
- [46] Hokchhay Tann, Soheil Hashemi, R Iris Bahar, and Sherief Reda. Hardware-software codesign of accurate, multiplier-free deep neural networks. In *Design Automation Conference (DAC), 2017 54th ACM/EDAC/IEEE*, pages 1–6. IEEE, 2017.
- [47] Yee Teh, Victor Bapst, Wojciech M Czarnecki, John Quan, James Kirkpatrick, Raia Hadsell, Nicolas Heess, and Razvan Pascanu. Distral: Robust multitask reinforcement learning. In *Advances in Neural Information Processing Systems*, pages 4496–4506, 2017.
- [48] Vladimir Vapnik and Rauf Izmailov. Learning using privileged information: similarity control and knowledge transfer. *Journal of machine learning research*, 16(20232049):55, 2015.
- [49] Thijs Vogels, Sai Praneeth Karimireddy, and Martin Jaggi. PowerSGD: Practical Low-Rank Gradient Compression for Distributed Optimization. *33th Advances in Neural Information Processing Systems*, 2019.
- [50] Wenhui Wang, Furu Wei, Li Dong, Hangbo Bao, Nan Yang, and Ming Zhou. Minilm: Deep self-attention distillation for task-agnostic compression of pre-trained transformers. *Advances in Neural Information Processing Systems*, 33:5776–5788, 2020.
- [51] Jianqiao Wangni, Jiale Wang, Ji Liu, and Tong Zhang. Gradient sparsification for communication-efficient distributed optimization. In *Advances in Neural Information Processing Systems*, pages 1306–1316, 2018.
- [52] Wei Wen, Cong Xu, Feng Yan, Chunpeng Wu, Yandan Wang, Yiran Chen, and Hai Li. Terngrad: Ternary gradients to reduce communication in distributed deep learning. In *Advances in Neural Information Processing Systems*, page 1509–1519, 2017.
- [53] Lin Xiao and Tong Zhang. A Proximal Stochastic Gradient Method with Progressive Variance Reduction. *SIAM Journal on Optimization*, 2014.
- [54] Li Yuan, Francis EH Tay, Guilin Li, Tao Wang, and Jiashi Feng. Revisiting Knowledge Distillation via Label Smoothing Regularization. *Conference on Computer Vision and Pattern Recognition*, 2020.

- 515 [55] Linfeng Zhang, Jiebo Song, Anni Gao, Jingwei Chen, Chenglong Bao, and Kaisheng Ma.  
516 Be your own teacher: Improve the performance of convolutional neural networks via self  
517 distillation. In *Proceedings of the IEEE/CVF International Conference on Computer Vision*,  
518 pages 3713–3722, 2019.
- 519 [56] Linfeng Zhang, Jiebo Song, Anni Gao, Jingwei Chen, Chenglong Bao, and Kaisheng Ma.  
520 Be Your Own Teacher: Improve the Performance of Convolutional Neural Networks via Self  
521 Distillation. *ICCV*, 2019.
- 522 [57] Xinshao Wang Ziyun Li, Di Hu, Neil M. Robertson, David A. Clifton, Christoph Meinel, and  
523 Haojin Yang. Not All Knowledge Is Created Equal: Mutual Distillation of Confident Knowledge.  
524 *NeurIPS 2022 Workshop(Trustworthy and Socially Responsible Machine Learning)*, 2022.

# Appendix

## Contents

|     |                                                                   |           |
|-----|-------------------------------------------------------------------|-----------|
| 527 | <b>1 Introduction</b>                                             | <b>1</b>  |
| 528 | <b>2 Related Work</b>                                             | <b>2</b>  |
| 529 | <b>3 Knowledge Distillation</b>                                   | <b>3</b>  |
| 530 | <b>4 Convergence Theory for Self-Distillation</b>                 | <b>5</b>  |
| 531 | <b>5 Removing Bias and Improving Variance Reduction</b>           | <b>7</b>  |
| 532 | <b>6 Convergence for Distillation of Compressed Models</b>        | <b>9</b>  |
| 533 | <b>7 Discussion and Future Work</b>                               | <b>9</b>  |
| 534 | <b>A Basic Facts and Inequalities</b>                             | <b>15</b> |
| 535 | <b>B Proofs for Section 3</b>                                     | <b>16</b> |
| 536 | B.1 Binary Logistic Regression . . . . .                          | 16        |
| 537 | B.2 Multi-class Classification with Soft-max . . . . .            | 17        |
| 538 | B.3 Generic Non-linear Classification . . . . .                   | 17        |
| 539 | <b>C Proofs for Section 4</b>                                     | <b>19</b> |
| 540 | C.1 Key lemma . . . . .                                           | 19        |
| 541 | C.2 Proof of Theorem 1 . . . . .                                  | 20        |
| 542 | C.3 Proof of Theorem 2 . . . . .                                  | 22        |
| 543 | <b>D Proofs for Section 5</b>                                     | <b>22</b> |
| 544 | D.1 Proof of Theorem 3 . . . . .                                  | 22        |
| 545 | <b>E Proofs for Section 6</b>                                     | <b>23</b> |
| 546 | E.1 Five Lemmas . . . . .                                         | 23        |
| 547 | E.2 Proof of Theorem 4 . . . . .                                  | 25        |
| 548 | <b>F Additional Experimental Validation</b>                       | <b>27</b> |
| 549 | F.1 The impact of the learning hyperparameters . . . . .          | 27        |
| 550 | F.2 The impact of the teacher’s quality . . . . .                 | 27        |
| 551 | F.3 The impact of knowledge distillation on compression . . . . . | 27        |
| 552 | <b>G Limitations</b>                                              | <b>28</b> |

## A Basic Facts and Inequalities

To facilitate the reading of technical part of the work, here we present several standard inequalities and basic facts that we are going to use in the proofs.

• Usually we need to bound the sum of two error terms by individual errors using the following simple bound

$$\|a + b\|^2 \leq 2\|a\|^2 + 2\|b\|^2. \quad (20)$$

A direct generalization of this inequality for arbitrary number of summation terms is the following one:

$$\left\| \sum_{i=1}^n a_i \right\|^2 \leq n \sum_{i=1}^n \|a_i\|^2. \quad (21)$$

This inequality can be seen as a special case of Jensen's inequality for convex functions  $h: \mathbb{R}^d \rightarrow \mathbb{R}$ ,

$$h\left(\sum_{i=1}^n \alpha_i x_i\right) \leq \sum_{i=1}^n \alpha_i h(x_i),$$

where  $x_i \in \mathbb{R}^d$  are any vectors and  $\alpha_i \in [0, 1]$  with  $\sum_{i=1}^n \alpha_i = 1$ . Then, (20) follows from Jensen's inequality when  $h(x) = \|x\|^2$  and  $\alpha_1 = \dots = \alpha_n = \frac{1}{n}$ . A more general version of the Jensen's inequality, from the perspective of probability theory, is

$$h(\mathbb{E}z) \leq \mathbb{E}h(z) \quad (22)$$

for any convex function  $h$  and random vector  $z \in \mathbb{R}^d$ .

Another extension of (20), which we actually apply in that form, is Peter-Paul inequality given by

$$\langle a, b \rangle \leq \frac{1}{2s} \|a\|^2 + \frac{s}{2} \|b\|^2, \quad (23)$$

for any positive  $s > 0$ . Then, (20) is the special case of (23) with  $s = 1$ .

• Typically, a function  $f$  is called  $L$ -smooth if its gradient is Lipschitz continuous with Lipschitz constant  $L \geq 0$ , namely

$$\|\nabla f(x) - \nabla f(y)\| \leq L \|x - y\|, \quad (24)$$

In particular, smoothness inequality (24) implies the following quadratic upper bound [32]:

$$f(y) \leq f(x) + \langle \nabla f(x), y - x \rangle + \frac{L}{2} \|y - x\|^2, \quad (25)$$

for all points  $x, y \in \mathbb{R}^d$ . If the function  $f$  is additionally convex, then the following lower bound holds too:

$$f(y) \geq f(x) + \langle \nabla f(x), y - x \rangle + \frac{1}{2L} \|\nabla f(y) - \nabla f(x)\|^2. \quad (26)$$

• As we mentioned in the main part of the paper, function  $f$  is called  $\mu$ -strongly convex if the following inequality holds

$$f(y) \geq f(x) + \langle \nabla f(x), y - x \rangle + \frac{\mu}{2} \|y - x\|^2, \quad (27)$$

for all points  $x, y \in \mathbb{R}^d$ . Recall that strong quasi-convexity assumption (1) is the special case of (27) when  $y = x^*$ . In other words, strong convexity (27) implies strong quasi-convexity (1). Continuing this chain of conditions, strong quasi-convexity (1) implies PL condition (9), which, in turn, implies the so-called *Quadratic Growth* condition given below

$$f(x) - f^* \geq \frac{\mu}{8} \|x - x^*\|^2, \quad (28)$$

for all  $x \in \mathbb{R}^d$ . Derivations of these implications and relationship with other conditions can be found in [16].

• As many analyses with linear or exponential convergence speed, our analysis also uses a very standard transformation from a single-step recurrence relation to convergence inequality. Specifically, assume we have the following recursion for  $e^t$ ,  $t = 0, 1, 2, \dots$ :

$$e^{t+1} \leq (1 - \eta)e^t + N,$$

583 with constants  $\eta \in (0, 1]$  and  $N \geq 0$ . Then, repeated application of the above recursion gives

$$\begin{aligned} e^t &\leq (1 - \eta)^t e^0 + (1 - \eta)^{t-1} N + (1 - \eta)^{t-2} N + \cdots + (1 - \eta)^0 N \\ &\leq (1 - \eta)^t e^0 + N \sum_{j=0}^{\infty} (1 - \eta)^j = (1 - \eta)^t e^0 + \frac{N}{\eta}. \end{aligned} \quad (29)$$

584 • If  $z \in \mathbb{R}^d$  is a random vector and  $x \in \mathbb{R}^d$  is fixed (or has randomness independent of  $z$ ), then the  
585 following decomposition holds:

$$\mathbb{E} [\|x + z\|^2] = \|x\|^2 + \mathbb{E} [\|z\|^2] \quad (30)$$

## 586 B Proofs for Section 3

587 For the sake of presentation, we first consider binary logistic regression problem as a special case of  
588 multi-class classification.

### 589 B.1 Binary Logistic Regression

In this case we have  $d$ -dimensional input vectors  $a_n \in \mathbb{R}^d$  with their binary true labels  $b_n \in \mathcal{B} = [0, 1]$ , predictor  $\phi_x(a) = \sigma(x^\top \bar{a}) \in (0, 1)$  with parameters  $x \in \mathcal{P} = \mathbb{R}^{d+1}$  and lifted input vector  $\bar{a} = [a \ 1]^\top \in \mathbb{R}^{d+1}$  (to avoid additional notation for the bias terms), where  $\sigma(t) = \frac{1}{1+e^{-t}}$ ,  $t \in \mathbb{R}$  is the sigmoid function. Besides, the loss is given by the cross entropy loss below

$$\ell(p, q) = H\left(\begin{bmatrix} q \\ 1-q \end{bmatrix}, \begin{bmatrix} p \\ 1-p \end{bmatrix}\right) = -q \log p - (1 - q) \log(1 - p), \quad p, q \in [0, 1].$$

590 Based on (2) and (3), we have

$$\begin{aligned} f_n(x \mid \theta, \lambda) &= (1 - \lambda)f_n(x) + \lambda f_n(x \mid \theta) \\ &= (1 - \lambda)\ell(\phi_x(a_n), b_n) + \lambda\ell(\phi_x(a_n), \phi_\theta(a_n)) \\ &= \ell(\phi_x(a_n), (1 - \lambda)b_n + \lambda\phi_\theta(a_n)) \\ &= \ell(\sigma(x^\top \bar{a}_n), (1 - \lambda)b_n + \lambda\sigma(\theta^\top \bar{a}_n)) = \ell(\sigma(x^\top \bar{a}_n), s_n) \\ &= s_n \log(1 + e^{-x^\top \bar{a}_n}) + (1 - s_n) \log(1 + e^{x^\top \bar{a}_n}), \end{aligned}$$

591 where  $s_n = (1 - \lambda)b_n + \lambda\sigma(\theta^\top \bar{a}_n)$  are the soft labels. Notice that  $f_n(x \mid \theta, \lambda = 0) = f_n(x)$ .  
592 Next, we derive an expression for the stochastic gradient for the above objective, namely the gradient  
593  $\nabla_x f_n(x \mid \theta, \lambda)$  of the loss associated with  $n^{\text{th}}$  data point  $(a_n, b_n)$ .

$$\begin{aligned} \nabla_x \left[ s_n \log(1 + e^{-x^\top \bar{a}_n}) \right] &= -s_n \frac{e^{-x^\top \bar{a}_n}}{1 + e^{-x^\top \bar{a}_n}} \bar{a}_n = -s_n \sigma(-x^\top \bar{a}_n) \bar{a}_n, \\ \nabla_x \left[ (1 - s_n) \log(1 + e^{x^\top \bar{a}_n}) \right] &= (1 - s_n) \frac{e^{x^\top \bar{a}_n}}{1 + e^{x^\top \bar{a}_n}} \bar{a}_n = (1 - s_n) \sigma(x^\top \bar{a}_n) \bar{a}_n. \end{aligned}$$

594 Hence, using the identity  $\sigma(t) + \sigma(-t) = 1$  for the sigmoid function, we get

$$\begin{aligned} \nabla_x f_n(x \mid \theta, \lambda) &= [-s_n(1 - \sigma(x^\top \bar{a}_n)) + (1 - s_n)\sigma(x^\top \bar{a}_n)] \bar{a}_n \\ &= [\sigma(x^\top \bar{a}_n) - s_n] \bar{a}_n \\ &= [\sigma(x^\top \bar{a}_n) - (1 - \lambda)b_n - \lambda\sigma(\theta^\top \bar{a}_n)] \bar{a}_n \\ &= (\sigma(x^\top \bar{a}_n) - b_n) \bar{a}_n - \lambda(\sigma(\theta^\top \bar{a}_n) - b_n) \bar{a}_n = \nabla f_n(x) - \lambda \nabla f_n(\theta). \end{aligned}$$

595 Thus, the distillation gradient for binary logistic regression tasks the same form as (5).



## 596 B.2 Multi-class Classification with Soft-max

Now we extend the above steps for multi-class problem. Here we consider a  $K$ -classification model with one hidden layer that has soft-max as the last layer, i.e., the forward pass has the following steps:

$$a_n \rightarrow X^\top a_n \rightarrow \phi_X(a_n) := \sigma(X^\top a_n) \in \mathbb{R}^K,$$

597 where  $X = [x_1 \ x_2 \ \dots \ x_K] \in \mathbb{R}^{d \times K}$  are the student's model parameters,  $a_n \in \mathcal{A} = \mathbb{R}^d$  is the input  
598 data and  $\sigma$  is the soft-max function (as a generalization of sigmoid function). Then we simplify the  
599 loss

$$\begin{aligned} f_n(X \mid \Theta, \lambda) &= (1 - \lambda)f_n(X) + \lambda f_n(X \mid \Theta) \\ &= (1 - \lambda)\ell(\phi_X(a_n), b_n) + \lambda\ell(\phi_X(a_n), \phi_\Theta(a_n)) \\ &= \ell(\phi_X(a_n), (1 - \lambda)b_n + \lambda\phi_\Theta(a_n)) \\ &= \ell(\sigma(X^\top a_n), s_n) \\ &= -\sum_{k=1}^K s_{n,k} \log \sigma(X^\top a_n)_k = -\sum_{k=1}^K s_{n,k} \log \frac{e^{x_k^\top a_n}}{\sum_{j=1}^K e^{x_j^\top a_n}} \\ &= \sum_{k=1}^K s_{n,k} \left( \log \sum_{j=1}^K e^{x_j^\top a_n} - \log e^{x_k^\top a_n} \right) = \sum_{k=1}^K s_{n,k} \log \sum_{j=1}^K e^{x_j^\top a_n} - \sum_{k=1}^K s_{n,k} \log e^{x_k^\top a_n} \\ &= \log \sum_{k=1}^K e^{x_k^\top a_n} - \sum_{k=1}^K s_{n,k} \log e^{x_k^\top a_n} = \log \sum_{k=1}^K e^{x_k^\top a_n} - \sum_{k=1}^K s_{n,k} x_k^\top a_n, \end{aligned}$$

600 where  $s_n = (1 - \lambda)b_n + \lambda\phi_\Theta(a_n) \in \mathbb{R}^K$  are the soft labels. Next, we derive an expression for  
601 the stochastic gradient for the above objective, namely the gradient  $\nabla_{x_k} f_n(X \mid \Theta, \lambda)$  of the loss  
602 associated with  $n^{th}$  data point  $(a_n, b_n)$ .

$$\begin{aligned} \nabla_{x_k} f_n(X \mid \Theta, \lambda) &= \nabla_{x_k} \left[ \log \sum_{k=1}^K e^{x_k^\top a_n} - \sum_{k=1}^K s_{n,k} x_k^\top a_n \right] = \frac{e^{x_k^\top a_n}}{\sum_{i=1}^K e^{x_i^\top a_n}} a_n - s_{n,k} a_n \\ &= (\sigma(X^\top a_n) - s_n)_k a_n = (\sigma(X^\top a_n) - b_n)_k a_n - \lambda (\sigma(\Theta^\top a_n) - b_n)_k a_n \\ &= \nabla_{x_k} f_n(X) - \lambda \nabla_{\theta_k} f_n(\Theta). \end{aligned}$$

Again, we get the same expression (5) for the distillation gradient

$$\nabla_X f_n(X \mid \Theta, \lambda) = \nabla_X f_n(X) - \lambda \nabla_\Theta f_n(\Theta).$$

## 603 B.3 Generic Non-linear Classification

Finally, consider arbitrary classification model that ends with linear layer and soft-max as the last layer, i.e., the forward pass has the following steps

$$a_n \rightarrow \psi_n(x) \rightarrow \phi_x(a_n) := \sigma(\psi_n(x)) \in \mathbb{R}^K,$$

604 where  $a_n \in \mathcal{A} = \mathbb{R}^d$  is the input data and  $\psi_n(x) \in \mathbb{R}^K$  are the logits with respect to the model  
605 parameters  $x$ . Denote  $\varphi_n(z) := \ell(\sigma(z), b_n)$  the loss associated with logits  $z$  and the true label  $b_n$ .  
606 In words,  $\psi_n$  gives the logits from the input data, while  $\varphi_n$  gives the loss from given logits. Then,  
607 clearly we have the following representation for the loss function  $f_n(x) = \varphi_n(\psi_n(x))$ . Next, let us

608 simplify the distillation loss as

$$\begin{aligned}
f_n(x \mid \theta, \lambda) &= (1 - \lambda)f_n(x) + \lambda f_n(x \mid \theta) \\
&= (1 - \lambda)\ell(\phi_x(a_n), b_n) + \lambda\ell(\phi_x(a_n), \phi_\theta(a_n)) \\
&= \ell(\phi_x(a_n), (1 - \lambda)b_n + \lambda\phi_\theta(a_n)) \\
&= \ell(\sigma(\psi_n(x), (1 - \lambda)b_n + \lambda\sigma(\psi_n(\theta))) \\
&= \ell(\sigma(\psi_n(x), s_n)) \\
&= -\sum_{k=1}^K s_{n,k} \log \sigma(\psi_n(x))_k = -\sum_{k=1}^K s_{n,k} \log \frac{e^{\psi_{n,k}(x)}}{\sum_{j=1}^K e^{\psi_{n,j}(x)}} \\
&= \sum_{k=1}^K s_{n,k} \left( \log \sum_{j=1}^K e^{\psi_{n,j}(x)} - \psi_{n,k}(x) \right) \\
&= \sum_{k=1}^K s_{n,k} \log \sum_{j=1}^K e^{\psi_{n,j}(x)} - \sum_{k=1}^K s_{n,k} \psi_{n,k}(x) \\
&= \log \sum_{k=1}^K e^{\psi_{n,k}(x)} - \sum_{k=1}^K s_{n,k} \psi_{n,k}(x),
\end{aligned}$$

609 where  $s_n = (1 - \lambda)b_n + \lambda\phi_\theta(a_n)$ . Now we need to differentiate obtained expression and derive an  
610 expression for the stochastic gradient for the above objective, namely the gradient  $\nabla_x f_n(x \mid \theta, \lambda)$  of  
611 the loss associated with  $n^{th}$  data point  $(a_n, b_n)$ . Applying the gradient operator, we get

$$\begin{aligned}
\nabla_x f_n(x \mid \theta, \lambda) &= \nabla_x \left[ \log \sum_{k=1}^K e^{\psi_{n,k}(x)} - \sum_{k=1}^K s_{n,k} \psi_{n,k}(x) \right] \\
&= \sum_{k=1}^K \frac{e^{\psi_{n,k}(x)}}{\sum_{j=1}^K e^{\psi_{n,j}(x)}} \nabla_x \psi_{n,k}(x) - \sum_{k=1}^K s_{n,k} \nabla_x \psi_{n,k}(x) \\
&= \sum_{k=1}^K (\sigma(\psi_n(x))_k - s_{n,k}) \nabla_x \psi_{n,k}(x) \\
&= J\psi_n(x) (\sigma(\psi_n(x)) - s_n),
\end{aligned}$$

where

$$J\psi_n(x) := \frac{\partial \psi_n(x)}{\partial x} = [\nabla \psi_{n,1}(x) \nabla \psi_{n,2}(x) \dots \nabla \psi_{n,K}(x)] \in \mathbb{R}^{d \times K}$$

612 is the Jacobian of vector-valued function  $\psi_n: \mathbb{R}^d \rightarrow \mathbb{R}^K$ . From the derivation so far we imply that

$$\sigma(\psi_n(x)) - s_n = (\sigma(\psi_n(x)) - b_n) - \lambda(\sigma(\psi_n(\theta)) - b_n) = \nabla \varphi_n(\psi_n(x)) - \lambda \nabla \varphi_n(\psi_n(\theta)).$$

613 Taking into account that  $f_n(x) = \varphi_n(\psi_n(x))$ , we show the following form for the distilled gradient

$$\begin{aligned}
\nabla_x f_n(x \mid \theta, \lambda) &= J\psi_n(x) (\nabla \varphi_n(\psi_n(x)) - \lambda \nabla \varphi_n(\psi_n(\theta))) \\
&= \frac{\partial \psi_n(x)}{\partial x} \frac{\partial f_n(x)}{\partial \psi_n(x)} - \lambda \frac{\partial \psi_n(x)}{\partial x} \frac{\partial f_n(\theta)}{\partial \psi_n(\theta)}.
\end{aligned}$$

## 614 C Proofs for Section 4

615 Before we proceed to the proofs of Theorems 1 and 2, we prove a key lemma that will be useful in  
 616 both proofs. The lemma we are about to present covers *Part 2 (Optimal distillation weight)* and *Part*  
 617 *3 (Impact of the teacher)* of the proof overview discussed in the main content.

### 618 C.1 Key lemma

619 To simplify the expressions in our proofs, let us introduce some notation describing stochastic  
 620 gradients. Denote the signal-to-noise ratio with respect to parameters  $\theta$  by

$$\beta(\theta) := \frac{\|\nabla f(\theta)\|^2}{\mathbb{E}[\|\nabla f_\xi(\theta)\|^2]} \in [0, 1], \quad (31)$$

621 and correlation coefficient between stochastic gradients  $\nabla f_\xi(x)$  and  $\nabla f_\xi(y)$  by

$$\rho(x, y) := \frac{\text{Cov}(x, y)}{\sqrt{\text{Var}(x)\text{Var}(y)}} \in [-1, 1], \quad (32)$$

622 where

$$\text{Cov}(x, y) := \mathbb{E}[\langle \nabla f_\xi(x) - \nabla f(x), \nabla f_\xi(y) - \nabla f(y) \rangle], \quad \text{Var}(x) := \sqrt{\text{Cov}(x, x)},$$

623 are the covariance and variance respectively.

624 **Lemma 1.** *Let  $N(\lambda) = \lambda^2 \|\nabla f(\theta)\|^2 + c\gamma \mathbb{E}[\|\nabla f_\xi(x^*) - \lambda \nabla f_\xi(\theta)\|^2]$  for some constant  $c \geq 0$ .  
 625 Then, the optimal  $\lambda$  that minimizes  $N(\lambda)$  is given by*

$$\lambda_* = \frac{\mathbb{E}[\langle \nabla f_\xi(x^*), \nabla f_\xi(\theta) \rangle]}{\mathbb{E}[\|\nabla f_\xi(\theta)\|^2] + \frac{1}{c\gamma} \|\nabla f(\theta)\|^2}. \quad (33)$$

Moreover,

$$\frac{N(\lambda_*)}{N(0)} = 1 - \rho^2(x^*, \theta) \frac{1 - \beta(\theta)}{1 + \frac{1}{c\gamma} \beta(\theta)} \leq \min \left( 1, \mathcal{O} \left( \frac{1}{\gamma} (f(\theta) - f^*) \right) \right).$$

*Proof.* Notice that  $N(\lambda)$  is quadratic in  $\lambda$  and using the first-order optimality condition, we conclude

$$\frac{d}{d\lambda} N(\lambda) = 2\lambda \|\nabla f(\theta)\|^2 + c\gamma (-2\mathbb{E}[\langle \nabla f_\xi(x^*), \nabla f_\xi(\theta) \rangle] + 2\lambda \mathbb{E}[\|\nabla f_\xi(\theta)\|^2]) = 0,$$

626 we get (33). Furthermore, plugging the expression of  $\lambda_*$  into  $N(\lambda)$ , we get

$$\begin{aligned} N(\lambda_*) &= c\gamma \left( \frac{\lambda_*^2}{c\gamma} \|\nabla f(\theta)\|^2 + \mathbb{E}[\|\nabla f_\xi(x^*)\|^2] - 2\lambda_* \mathbb{E}[\langle \nabla f_\xi(x^*), \nabla f_\xi(\theta) \rangle] + \lambda_*^2 \mathbb{E}[\|\nabla f_\xi(\theta)\|^2] \right) \\ &= c\gamma \left( \mathbb{E}[\|\nabla f_\xi(x^*)\|^2] - 2\lambda_* \mathbb{E}[\langle \nabla f_\xi(x^*), \nabla f_\xi(\theta) \rangle] + \lambda_*^2 \left( \mathbb{E}[\|\nabla f_\xi(\theta)\|^2] + \frac{1}{c\gamma} \|\nabla f(\theta)\|^2 \right) \right) \\ &= c\gamma \left( \mathbb{E}[\|\nabla f_\xi(x^*)\|^2] - \frac{(\mathbb{E}[\langle \nabla f_\xi(x^*), \nabla f_\xi(\theta) \rangle])^2}{\mathbb{E}[\|\nabla f_\xi(\theta)\|^2] + \frac{1}{c\gamma} \|\nabla f(\theta)\|^2} \right) \\ &= c\gamma \mathbb{E}[\|\nabla f_\xi(x^*)\|^2] \left( 1 - \frac{(\mathbb{E}[\langle \nabla f_\xi(x^*), \nabla f_\xi(\theta) \rangle])^2}{\left( \mathbb{E}[\|\nabla f_\xi(\theta)\|^2] + \frac{1}{c\gamma} \|\nabla f(\theta)\|^2 \right) (\mathbb{E}[\|\nabla f_\xi(x^*)\|^2])} \right). \end{aligned}$$

Note that  $N(0) = c\gamma \sigma_*^2$ . From  $\mathbb{E}[\nabla f_\xi(x^*)] = \nabla f(x^*) = 0$ , we imply that

$$\text{Cov}(x^*, \theta) = \mathbb{E}[\langle \nabla f_\xi(x^*), \nabla f_\xi(\theta) - \nabla f(\theta) \rangle] = \mathbb{E}[\langle \nabla f_\xi(x^*), \nabla f_\xi(\theta) \rangle],$$

627 and therefore

$$\rho(x^*, \theta) = \frac{\mathbb{E}[\langle \nabla f_\xi(x^*), \nabla f_\xi(\theta) \rangle]}{\sqrt{\mathbb{E}[\|\nabla f_\xi(x^*)\|^2]} \sqrt{\mathbb{E}[\|\nabla f_\xi(\theta)\|^2] - \|\nabla f(\theta)\|^2}}.$$

628 Now we can simplify the expression for  $N(\lambda_*)$  as follows

$$\begin{aligned}
\frac{N(\lambda_*)}{N(0)} &= 1 - \frac{(\mathbb{E}[\langle \nabla f_\xi(x^*), \nabla f_\xi(\theta) \rangle])^2}{\left(\mathbb{E}[\|\nabla f_\xi(\theta)\|^2] + \frac{1}{c\gamma} \|\nabla f(\theta)\|^2\right) (\mathbb{E}[\|\nabla f_\xi(x^*)\|^2])} \\
&= 1 - \frac{(\mathbb{E}[\langle \nabla f_\xi(x^*), \nabla f_\xi(\theta) \rangle])^2}{(\mathbb{E}[\|\nabla f_\xi(\theta)\|^2] - \|\nabla f(\theta)\|^2) (\mathbb{E}[\|\nabla f_\xi(x^*)\|^2])} \frac{\mathbb{E}[\|\nabla f_\xi(\theta)\|^2] - \|\nabla f(\theta)\|^2}{\mathbb{E}[\|\nabla f_\xi(\theta)\|^2] + \frac{1}{c\gamma} \|\nabla f(\theta)\|^2} \\
&= 1 - \rho^2(x^*, \theta) \frac{1 - \beta(\theta)}{1 + \frac{1}{c\gamma} \beta(\theta)}.
\end{aligned}$$

629 Here,  $\rho(x^*, \theta)$  is the correlation coefficient between stochastic gradients at  $x^*$  and  $\theta$ . Hence, we  
630 showed with tuned distillation weight the neighborhood can shrink by some factor depending  
631 on the teacher's parameters. In the extreme case when the teacher  $\theta = x^*$  is optimal, we have  
632  $\rho(x^*, \theta) = 1$ ,  $\beta(\theta) = 0$  and, thus, no neighborhood  $N(\lambda_*) = 0$ . This hints us on the fact that the  
633 reduction factor  $N(\lambda_*)/N(0)$  of the neighborhood is controlled by the “quality” of the teacher.

634 To make this argument rigorous, consider the teacher's model to be away from the optimal solution  
635  $x^*$  within the limit described by the following inequality

$$f(\theta) - f^* \leq \frac{\sigma(x^*)\sigma(\theta)}{\mathcal{L}}, \quad (34)$$

636 where  $\sigma^2(x) := \mathbb{E}[\|\nabla f_\xi(x)\|^2]$  is the second moment of the stochastic gradients. Without loss of  
637 generality, we assume that  $\sigma^2(x) > 0$  for all parameter choices  $x \in \mathbb{R}^d$ : otherwise we have  $\sigma_*^2 = 0$   
638 and even plain SGD ensures full variance reduction. Then, we can simplify the reduction factor as

$$\begin{aligned}
1 - \rho^2(x^*, \theta) \frac{1 - \beta(\theta)}{1 + \frac{1}{c\gamma} \beta(\theta)} &= 1 - \frac{(\mathbb{E}[\langle \nabla f_\xi(x^*), \nabla f_\xi(\theta) \rangle])^2}{\mathbb{E}[\|\nabla f_\xi(\theta)\|^2] \mathbb{E}[\|\nabla f_\xi(x^*)\|^2]} \frac{1}{1 + \frac{1}{c\gamma} \beta(\theta)} \\
&= 1 - \left( \frac{\sigma^2(\theta) + \sigma^2(x^*) - \mathbb{E}[\|\nabla f_\xi(x^*) - \nabla f_\xi(\theta)\|^2]}{2\sigma(\theta)\sigma(x^*)} \right)^2 \frac{1}{1 + \frac{1}{c\gamma} \beta(\theta)} \\
&= 1 - \left( \frac{\sigma^2(\theta) + \sigma^2(x^*)}{2\sigma(\theta)\sigma(x^*)} - \frac{\mathbb{E}[\|\nabla f_\xi(x^*) - \nabla f_\xi(\theta)\|^2]}{2\sigma(\theta)\sigma(x^*)} \right)^2 \frac{1}{1 + \frac{1}{c\gamma} \beta(\theta)} \\
&\stackrel{(10)+(34)}{\leq} 1 - \left( 1 - \frac{\mathcal{L}(f(\theta) - f^*)}{\sigma(\theta)\sigma(x^*)} \right)^2 \frac{1}{1 + \frac{2L}{c\gamma} \frac{f(\theta) - f^*}{\sigma^2(\theta)}} \\
&\leq \left( 2 + \frac{2L}{c\gamma \mathcal{L}} \frac{\sigma(x^*)}{\sigma(\theta)} \right) \frac{\mathcal{L}(f(\theta) - f^*)}{\sigma(\theta)\sigma(x^*)} \\
&= \left( \frac{2\mathcal{L}}{\sigma(x^*)\sigma(\theta)} + \frac{1}{c\gamma} \frac{2L}{\sigma^2(\theta)} \right) (f(\theta) - f^*) = \mathcal{O}\left(\frac{1}{\gamma}(f(\theta) - f^*)\right),
\end{aligned}$$

639 where the last inequality used  $1 - \frac{(1-u)^2}{1+uv} \leq (2+v)u$  for all  $u, v \geq 0$ . □

## 640 C.2 Proof of Theorem 1

641 Denote by  $\mathbb{E}_t[\cdot] := \mathbb{E}[\cdot \mid x^t]$  the conditional expectation with respect to  $x^t$ . Then, we start  
642 bounding the error using the update rule (7).

$$\begin{aligned}
& \mathbb{E}_t [\|x^{t+1} - x^*\|^2] \\
= & \|x^t - x^*\|^2 - 2\gamma \langle x^t - x^*, \nabla f(x^t) - \lambda \nabla f(\theta) \rangle + \gamma^2 \mathbb{E}_t [\|\nabla f_\xi(x^t) - \lambda \nabla f_\xi(\theta)\|^2] \\
= & \|x^t - x^*\|^2 - 2\gamma \langle x^t - x^*, \nabla f(x^t) \rangle + 2\gamma\lambda \langle x^t - x^*, \nabla f(\theta) \rangle + \gamma^2 \mathbb{E}_t [\|\nabla f_\xi(x^t) - \lambda \nabla f_\xi(\theta)\|^2] \\
\stackrel{(1)+(20)}{\leq} & (1 - \gamma\mu) \|x^t - x^*\|^2 - 2\gamma(f(x^t) - f(x^*)) + 2\gamma\lambda \langle x^t - x^*, \nabla f(\theta) \rangle \\
& + 2\gamma^2 \mathbb{E}_t [\|\nabla f_\xi(x^t) - \nabla f_\xi(x^*)\|^2] + 2\gamma^2 \mathbb{E} [\|\nabla f_\xi(x^*) - \lambda \nabla f_\xi(\theta)\|^2] \\
\stackrel{(28)+(23)}{\leq} & (1 - \gamma\mu) \|x^t - x^*\|^2 - \gamma(f(x^t) - f(x^*)) - \frac{\gamma\mu}{8} \|x^t - x^*\|^2 + \frac{\gamma\mu}{8} \|x^t - x^*\|^2 + \frac{8\gamma}{\mu} \lambda^2 \|\nabla f(\theta)\|^2 \\
& + 2\gamma^2 \mathbb{E}_t [\|\nabla f_\xi(x^t) - \nabla f_\xi(x^*)\|^2] + 2\gamma^2 \mathbb{E} [\|\nabla f_\xi(x^*) - \lambda \nabla f_\xi(\theta)\|^2] \\
\stackrel{(3)}{\leq} & (1 - \gamma\mu) \|x^t - x^*\|^2 - \gamma(f(x^t) - f(x^*)) + \frac{8\gamma}{\mu} \lambda^2 \|\nabla f(\theta)\|^2 \\
& + 4\gamma^2 \mathcal{L}(f(x^t) - f(x^*)) + 2\gamma^2 \mathbb{E} [\|\nabla f_\xi(x^*) - \lambda \nabla f_\xi(\theta)\|^2] \\
= & (1 - \gamma\mu) \|x^t - x^*\|^2 - \gamma(1 - 4\gamma\mathcal{L})(f(x^t) - f(x^*)) \\
& + \frac{8\gamma}{\mu} \lambda^2 \|\nabla f(\theta)\|^2 + 2\gamma^2 \mathbb{E} [\|\nabla f_\xi(x^*) - \lambda \nabla f_\xi(\theta)\|^2] \\
\leq & (1 - \gamma\mu) \|x^t - x^*\|^2 + \frac{8\gamma}{\mu} \lambda^2 \|\nabla f(\theta)\|^2 + 2\gamma^2 \mathbb{E} [\|\nabla f_\xi(x^*) - \lambda \nabla f_\xi(\theta)\|^2],
\end{aligned}$$

643 where we used Peter-Paul inequality (23) with parameter  $s = \frac{8}{\mu}$  and the step-size bound  $\gamma \leq \frac{1}{4\mathcal{L}}$  in  
644 the last inequality. Applying full expectation and unrolling the recursion, we get

$$\begin{aligned}
\mathbb{E} [\|x^t - x^*\|^2] & \leq (1 - \gamma\mu) \mathbb{E} [\|x^{t-1} - x^*\|^2] + \frac{8\gamma}{\mu} \lambda^2 \|\nabla f(\theta)\|^2 + 2\gamma^2 \mathbb{E} [\|\nabla f_\xi(x^*) - \lambda \nabla f_\xi(\theta)\|^2] \\
& \stackrel{(29)}{\leq} (1 - \gamma\mu)^t \|x^0 - x^*\|^2 + \frac{8\lambda^2}{\mu^2} \|\nabla f(\theta)\|^2 + \frac{2\gamma}{\mu} \mathbb{E} [\|\nabla f_\xi(x^*) - \lambda \nabla f_\xi(\theta)\|^2] \\
& = (1 - \gamma\mu)^t \|x^0 - x^*\|^2 + \frac{8}{\mu^2} N_1(\lambda),
\end{aligned} \tag{35}$$

645 where  $N_1(\lambda) := \lambda^2 \|\nabla f(\theta)\|^2 + \frac{\gamma\mu}{4} \mathbb{E} [\|\nabla f_\xi(x^*) - \lambda \nabla f_\xi(\theta)\|^2]$ . Applying Lemma 1 with  $c = \mu/4$ ,  
646 we imply that for some  $\lambda = \lambda_*$  the neighborhood size is

$$N_1(\lambda_*) \stackrel{\text{Lemma 1}}{\leq} N_1(0) \cdot \min \left( 1, \mathcal{O} \left( \frac{1}{\gamma} (f(\theta) - f^*) \right) \right) = \frac{\mu\sigma_*^2}{4} \cdot \min(\gamma, \mathcal{O}(f(\theta) - f^*)).$$

647 Plugging the above bound of  $N_1$  into (35) completes the proof.

### 648 C.3 Proof of Theorem 2

649 We start the recursion from the  $L$ -smoothness condition of  $f$ . As before,  $\mathbb{E}_t$  denotes conditional  
650 expectation with respect to  $x^t$ .

$$\begin{aligned}
& \mathbb{E}_t [f(x^{t+1}) - f^*] \\
& \stackrel{(25)}{\leq} (f(x^t) - f^*) - \gamma \langle \nabla f(x^t), \nabla f(x^t) - \lambda \nabla f(\theta) \rangle + \frac{L\gamma^2}{2} \mathbb{E}_t [\|\nabla f_\xi(x^t) - \lambda \nabla f_\xi(\theta)\|^2] \\
& \stackrel{(20)}{\leq} (f(x^t) - f^*) - \gamma \|\nabla f(x^t)\|^2 + \gamma \lambda \langle \nabla f(x^t), \nabla f(\theta) \rangle \\
& \quad + L\gamma^2 \mathbb{E}_t [\|\nabla f_\xi(x^t) - \nabla f_\xi(x^*)\|^2] + L\gamma^2 \mathbb{E} [\|\nabla f_\xi(x^*) - \lambda \nabla f_\xi(\theta)\|^2] \\
& \stackrel{(9)+(23)}{\leq} (1 - \gamma\mu) (f(x^t) - f^*) - \frac{\gamma}{4} \|\nabla f(x^t)\|^2 - \frac{\gamma\mu}{2} (f(x^t) - f^*) + \frac{\gamma}{4} \|\nabla f(x^t)\|^2 + \gamma\lambda^2 \|\nabla f(\theta)\|^2 \\
& \quad + L\gamma^2 \mathbb{E}_t [\|\nabla f_\xi(x^t) - \nabla f_\xi(x^*)\|^2] + L\gamma^2 \mathbb{E} [\|\nabla f_\xi(x^*) - \lambda \nabla f_\xi(\theta)\|^2] \\
& \stackrel{(10)}{\leq} (1 - \gamma\mu) (f(x^t) - f^*) - \frac{\gamma\mu}{2} (f(x^t) - f^*) + \gamma\lambda^2 \|\nabla f(\theta)\|^2 \\
& \quad + 2L\mathcal{L}\gamma^2 (f(x^t) - f^*) + L\gamma^2 \mathbb{E} [\|\nabla f_\xi(x^*) - \lambda \nabla f_\xi(\theta)\|^2] \\
& = (1 - \gamma\mu) (f(x^t) - f^*) - \frac{\gamma\mu}{2} \left(1 - \gamma \frac{4L\mathcal{L}}{\mu}\right) (f(x^t) - f^*) \\
& \quad + \gamma\lambda^2 \|\nabla f(\theta)\|^2 + L\gamma^2 \mathbb{E} [\|\nabla f_\xi(x^*) - \lambda \nabla f_\xi(\theta)\|^2] \\
& \leq (1 - \gamma\mu) (f(x^t) - f^*) + \gamma\lambda^2 \|\nabla f(\theta)\|^2 + L\gamma^2 \mathbb{E} [\|\nabla f_\xi(x^*) - \lambda \nabla f_\xi(\theta)\|^2],
\end{aligned}$$

651 where in the last inequality we used step-size bound  $\gamma \leq \frac{1}{4\mathcal{L}} \frac{\mu}{L}$ . Applying full expectation and  
652 unrolling the recursion, we get

$$\begin{aligned}
\mathbb{E} [f(x^t) - f^*] & \leq (1 - \gamma\mu) \mathbb{E} [f(x^{t-1}) - f^*] + \gamma\lambda^2 \|\nabla f(\theta)\|^2 + L\gamma^2 \mathbb{E} [\|\nabla f_\xi(x^*) - \lambda \nabla f_\xi(\theta)\|^2] \\
& \stackrel{(29)}{\leq} (1 - \gamma\mu)^t (f(x^0) - f^*) + \frac{\lambda^2}{\mu} \|\nabla f(\theta)\|^2 + \frac{L\gamma}{\mu} \mathbb{E} [\|\nabla f_\xi(x^*) - \lambda \nabla f_\xi(\theta)\|^2] \\
& = (1 - \gamma\mu)^t (f(x^0) - f^*) + \frac{1}{\mu} N_2(\lambda),
\end{aligned} \tag{36}$$

where  $N_2(\lambda) := \lambda^2 \|\nabla f(\theta)\|^2 + L\gamma \mathbb{E} [\|\nabla f_\xi(x^*) - \lambda \nabla f_\xi(\theta)\|^2]$ . Similar to the previous case, we  
applying Lemma 1 with  $c = L$  and conclude that for some  $\lambda = \lambda_*$  the neighborhood size is

$$N_2(\lambda_*) \stackrel{\text{Lemma 1}}{\leq} N_2(0) \cdot \min \left(1, \mathcal{O} \left(\frac{1}{\gamma} (f(\theta) - f^*)\right)\right) = L\sigma_*^2 \cdot \min(\gamma, \mathcal{O}(f(\theta) - f^*)).$$

653 Plugging the above bound of  $N_2$  into (36) completes the proof.

## 654 D Proofs for Section 5

### 655 D.1 Proof of Theorem 3

656 Again, we start the recursion from the smoothness condition of  $f$ .

$$\begin{aligned}
& \mathbb{E}_t [f(x^{t+1}) - f^*] \\
& \stackrel{(25)}{\leq} (f(x^t) - f^*) - \gamma \langle \nabla f(x^t), \nabla f(x^t) \rangle + \frac{L\gamma^2}{2} \mathbb{E}_t [\|\nabla f_\xi(x^t) - \nabla f_\xi(\theta) + \nabla f(\theta)\|^2] \\
& \stackrel{(21)}{\leq} (f(x^t) - f^*) - \gamma \|\nabla f(x^t)\|^2 \\
& \quad + \frac{3}{2} L\gamma^2 \mathbb{E}_t [\|\nabla f_\xi(x^t) - \nabla f_\xi(x^*)\|^2] + \frac{3}{2} L\gamma^2 \mathbb{E} [\|\nabla f_\xi(\theta) - \nabla f_\xi(x^*)\|^2] + \frac{3}{2} L\gamma^2 \|\nabla f(\theta)\|^2 \\
& \stackrel{(9)+(10)}{\leq} (1 - \gamma\mu) (f(x^t) - f^*) - \gamma\mu (f(x^t) - f^*) \\
& \quad + 3L\mathcal{L}\gamma^2 (f(x^t) - f^*) + 3L\mathcal{L}\gamma^2 (f(\theta) - f^*) + 3L^2\gamma^2 (f(\theta) - f^*) \\
& \leq (1 - \gamma\mu) (f(x^t) - f^*) + 3L(L + \mathcal{L})\gamma^2 (f(\theta) - f^*),
\end{aligned}$$

where we used step-size bound  $\gamma \leq \frac{\mu}{3L\mathcal{L}}$  in the last step. Therefore,

$$\begin{aligned}\mathbb{E}[f(x^t) - f^*] &\leq (1 - \gamma\mu)\mathbb{E}[f(x^t) - f^*] + 3L(L + \mathcal{L})\gamma^2(f(\theta) - f^*) \\ &\stackrel{(29)}{\leq} (1 - \gamma\mu)^t(f(x^0) - f^*) + \frac{3L(L + \mathcal{L})}{\mu} \cdot \gamma(f(\theta) - f^*),\end{aligned}$$

which concludes the proof.

## E Proofs for Section 6

First, we break the update rule (18) into two parts by introducing an auxiliary model parameters  $y^t \in \mathbb{R}^d$ :

$$\begin{aligned}y^{t+1} &= x^t - \gamma(\nabla f_\xi(x^t) - \lambda \nabla f_\xi(\theta)), \\ x^{t+1} &= \mathcal{C}(y^{t+1}).\end{aligned}$$

Without loss of generality, we assume that initialization satisfies  $x^0 = y^0 = \mathcal{C}(y^0)$ . Then, for all  $t \geq 0$  we have  $x^t = \mathcal{C}(y^t)$  and the update rule of  $y^{t+1}$  can be written recursively without  $x^t$  via

$$y^{t+1} = \mathcal{C}(y^t) - \gamma(\nabla f_\xi(\mathcal{C}(y^t)) - \lambda \nabla f_\xi(\theta)). \quad (37)$$

Using unbiasedness of the compression operator  $\mathcal{C}$ , we decompose the error

$$\begin{aligned}\mathbb{E}[\|x^t - x^*\|^2] &\stackrel{(30)}{=} \mathbb{E}[\|x^t - y^t\|^2] + \mathbb{E}[\|y^t - x^*\|^2] \\ &= \mathbb{E}[\|\mathcal{C}(y^t) - y^t\|^2] + \mathbb{E}[\|y^t - x^*\|^2] \\ &\stackrel{(19)}{\leq} \omega \mathbb{E}[\|y^t\|^2] + \mathbb{E}[\|y^t - x^*\|^2] \\ &\stackrel{(20)}{\leq} (2\omega + 1)\mathbb{E}[\|y^t - x^*\|^2] + 2\omega \|x^*\|^2.\end{aligned} \quad (38)$$

Thus, our goal would be to analyze iterates (37) and derive the rate for  $x^t$ . In fact, the special case of (37) was analyzed by [17] in the non-stochastic case and without distillation ( $\lambda = 0$ ). The analysis we provide here for (37) is based on [17], and from this perspective, our analysis can be seen as an extension of their analysis.

To avoid another notation for the expected smoothness constant (see Assumption 3), analogous to (24) we assume that  $\mathcal{L}$  also satisfies the following smoothness inequality:

$$\mathbb{E}[\|\nabla f_\xi(x) - \nabla f_\xi(y)\|^2] \leq \mathcal{L}^2 \|x - y\|^2. \quad (39)$$

### E.1 Five Lemmas

First, we need to upper bound the compression error by function suboptimality. Denote  $\delta(x) := \mathcal{C}(x) - x$ . Let  $\mathbb{E}_\delta$  and  $\mathbb{E}_\xi$  be the expectations with respect to the compression operator  $\mathcal{C}$  and sampling  $\xi$  respectively.

**Lemma 2** (Lemma 1 in [17]). *Let  $\alpha = \frac{2\omega}{\mu}$  and  $\nu = 2\omega\|x^*\|^2$ . For all  $x \in \mathbb{R}^d$  we have*

$$\mathbb{E}_\delta \|\delta(x)\|^2 \leq 2\alpha(f(x) - f(x^*)) + \nu, \quad (40)$$

*Proof.* From (20) we imply  $\|x\|^2 \leq 2\|x - x^*\|^2 + 2\|x^*\|^2$ , and from  $\mu$ -strong convexity condition (27) we get  $\|x - x^*\|^2 \leq \frac{2}{\mu}(f(x) - f(x^*))$ . Putting these inequalities together, we arrive at

$$\mathbb{E}_\delta \|\delta(x)\|^2 \leq \omega\|x\|^2 \leq 2\omega\|x - x^*\|^2 + 2\omega\|x^*\|^2 \leq \frac{4\omega}{\mu}(f(x) - f(x^*)) + 2\omega\|x^*\|^2.$$

□

677 **Lemma 3.** For all  $x, y \in \mathbb{R}^d$  we have

$$\mathbb{E}\|\nabla f_\xi(x + \delta(x)) - \nabla f_\xi(y)\|^2 \leq \mathcal{L}^2 \left( \|x - y\|^2 + \mathbb{E}\|\delta(x)\|^2 \right), \quad (41)$$

678

$$f(x) \leq \mathbb{E}f(x + \delta(x)) \leq f(y) + \langle \nabla f(y), x - y \rangle + \frac{L}{2} \|x - y\|^2 + \frac{L}{2} \mathbb{E}\|\delta(x)\|^2. \quad (42)$$

679 *Proof.* Fix  $x$  and let  $\delta = \delta(x)$ . Inequality (41) follows from Lipschitz continuity of the gradient,  
680 applying expectation and using (19):

$$\mathbb{E}\|\nabla f_\xi(x + \delta) - \nabla f_\xi(y)\|^2 \stackrel{(39)}{\leq} \mathcal{L}^2 \mathbb{E}_\delta \|x + \delta - y\|^2 \stackrel{(19)+(30)}{=} \mathcal{L}^2 \left( \|x - y\|^2 + \mathbb{E}_\delta \|\delta\|^2 \right).$$

681 The first inequality in (42) follows by applying Jensen's inequality (22) and using (19). Since  $f$  is  
682  $L$ -smooth, we have

$$\begin{aligned} \mathbb{E}f(x + \delta) &\stackrel{(25)}{\leq} \mathbb{E}f(y) + \langle \nabla f(y), x + \delta - y \rangle + \frac{L}{2} \|x + \delta - y\|^2 \\ &\stackrel{(19)+(30)}{=} f(y) + \langle \nabla f(y), x - y \rangle + \frac{L}{2} \|x - y\|^2 + \frac{L}{2} \mathbb{E}\|\delta\|^2. \end{aligned}$$

683

□

684 **Lemma 4.** For all  $x, y \in \mathbb{R}^d$  it holds

$$\begin{aligned} \mathbb{E}_\delta \left\| \frac{\delta(x)}{\gamma} - \nabla f_\xi(x + \delta(x)) + \lambda \nabla f_\xi(\theta) \right\|^2 \\ \leq 2 \|\nabla f_\xi(y) - \lambda \nabla f_\xi(\theta)\|^2 + 2\mathcal{L}^2 \|x - y\|^2 + 2 \left( \mathcal{L}^2 + \frac{1}{\gamma^2} \right) \mathbb{E}_\delta \|\delta(x)\|^2. \end{aligned} \quad (43)$$

685 *Proof.* Fix  $x$ , and let  $\delta = \delta(x)$ . Then for every  $y \in \mathbb{R}^d$  we can write

$$\begin{aligned} &\mathbb{E}_\delta \left\| \frac{\delta}{\gamma} - \nabla f_\xi(x + \delta) + \lambda \nabla f_\xi(\theta) \right\|^2 \\ &= \mathbb{E}_\delta \left\| \frac{\delta}{\gamma} \pm \nabla f_\xi(y) - \nabla f_\xi(x + \delta) + \lambda \nabla f_\xi(\theta) \right\|^2 \\ &\stackrel{(20)}{\leq} 2\mathbb{E}_\delta \left\| \frac{\delta}{\gamma} - \nabla f_\xi(y) + \lambda \nabla f_\xi(\theta) \right\|^2 + 2\mathbb{E}_\delta \|\nabla f_\xi(y) - \nabla f_\xi(x + \delta)\|^2 \\ &\stackrel{(41)}{\leq} \frac{2}{\gamma^2} \mathbb{E}_\delta \|\delta\|^2 - \frac{2}{\gamma} \mathbb{E}_\delta \langle \delta, \nabla f_\xi(y) - \lambda \nabla f_\xi(\theta) \rangle + \|\nabla f_\xi(y) - \lambda \nabla f_\xi(\theta)\|^2 + 2\mathcal{L}^2 \left( \|x - y\|^2 + \mathbb{E}_\delta \|\delta\|^2 \right) \\ &\stackrel{(19)}{=} \frac{2}{\gamma^2} \mathbb{E}_\delta \|\delta\|^2 + 2 \|\nabla f_\xi(y) - \lambda \nabla f_\xi(\theta)\|^2 + 2\mathcal{L}^2 \left( \|x - y\|^2 + \mathbb{E}_\delta \|\delta\|^2 \right). \end{aligned}$$

686

□

687 The next lemma generalizes the strong convexity inequality (27) (special case of  $\delta(x) \equiv 0$ ).

688 **Lemma 5.** If  $f$  is  $L$ -smooth and  $\mu$ -strongly convex, then for all  $x, y \in \mathbb{R}^d$ , it holds

$$f(y) \geq f(x) + \langle \mathbb{E}[\nabla f(x + \delta)], y - x \rangle + \frac{\mu}{2} \|y - x\|^2 - \frac{L - \mu}{2} \mathbb{E}\|\delta(x)\|^2. \quad (44)$$

*Proof.* Fix  $x$  and let  $\delta = \delta(x)$ . Using (27) with  $x \leftarrow x + \delta$ , we get

$$f(y) \geq f(x + \delta) + \langle \nabla f(x + \delta), y - x - \delta \rangle + \frac{\mu}{2} \|y - x - \delta\|^2.$$

689 Applying expectation and (30), we get

$$f(y) \geq \mathbb{E}f(x + \delta) + \mathbb{E}\langle \nabla f(x + \delta), y - x \rangle - \mathbb{E}\langle \nabla f(x + \delta), \delta \rangle + \frac{\mu}{2} \|y - x\|^2 + \frac{\mu}{2} \mathbb{E}\|\delta\|^2.$$



690 It remains to bound the term  $-\mathbb{E}\langle \nabla f(x + \delta), \delta \rangle$ , which can be done using  $L$ -smoothness and applying  
 691 expectation as follows:

$$-\mathbb{E}\langle \nabla f(x + \delta), \delta \rangle \stackrel{(25)}{\geq} \mathbb{E} \left[ f(x) - f(x + \delta) - \frac{L}{2} \|\delta\|^2 \right] = f(x) - \mathbb{E}f(x + \delta) - \frac{L}{2} \mathbb{E}\|\delta\|^2.$$

692

□

693 **Lemma 6.** Denote  $A = 2\mathcal{L} + \left(\mathcal{L}^2 + \frac{1}{\gamma^2}\right)\alpha$  and  $B = \left(\mathcal{L} + \frac{1}{\gamma^2}\right)\nu$ , where  $\alpha, \nu$  are defined in  
 694 Lemma 2. Then

$$\begin{aligned} \mathbb{E} \left\| \frac{\delta(x)}{\gamma} - \nabla f_{\xi}(x + \delta(x)) + \lambda \nabla f_{\xi}(\theta) \right\|^2 \\ \leq 4A(f(x) - f(x_*)) + 2B + 4\mathbb{E}\|\nabla f_{\xi}(x^*) - \lambda \nabla f_{\xi}(\theta)\|^2, \quad (45) \end{aligned}$$

695 *Proof.* Using (43) with  $y = x$ , we get

$$\begin{aligned} & \mathbb{E} \left\| \frac{\delta(x)}{\gamma} - \nabla f_{\xi}(x + \delta(x)) + \lambda \nabla f_{\xi}(\theta) \right\|^2 \\ & \stackrel{(43)}{\leq} 2\mathbb{E}\|\nabla f_{\xi}(x) - \lambda \nabla f_{\xi}(\theta)\|^2 + 2 \left( \mathcal{L}^2 + \frac{1}{\gamma^2} \right) \mathbb{E}\|\delta(x)\|^2 \\ & \stackrel{(20)+(26)+(40)}{\leq} 8\mathcal{L}(f(x) - f(x_*)) + 4\mathbb{E}\|\nabla f_{\xi}(x^*) - \lambda \nabla f_{\xi}(\theta)\|^2 + 2 \left( \mathcal{L}^2 + \frac{1}{\gamma^2} \right) (2\alpha(f(x) - f(x_*)) + \nu) \\ & = 4 \left( 2\mathcal{L} + \left( \mathcal{L}^2 + \frac{1}{\gamma^2} \right) \alpha \right) (f(x) - f(x_*)) + 2 \left( \mathcal{L}^2 + \frac{1}{\gamma^2} \right) \nu + 4\mathbb{E}\|\nabla f_{\xi}(x^*) - \lambda \nabla f_{\xi}(\theta)\|^2. \end{aligned}$$

696

□

## 697 E.2 Proof of Theorem 4

698 Denoting  $\delta^t = \delta(y^t)$  we have  $\mathcal{C}(y^t) = y^t + \delta^t$ . Then

$$\begin{aligned} & \|y^{t+1} - x^*\|^2 \\ &= \|\mathcal{C}(y^t) - \gamma \nabla f_{\xi}(\mathcal{C}(y^t)) + \gamma \lambda \nabla f_{\xi}(\theta) - x^*\|^2 \\ &= \|y^t - x^* + \delta^t - \gamma \nabla f_{\xi}(y^t + \delta^t) + \gamma \lambda \nabla f_{\xi}(\theta)\|^2 \\ &= \|y^t - x^*\|^2 + 2\langle \delta^t - \gamma \nabla f_{\xi}(y^t + \delta^t) + \gamma \lambda \nabla f_{\xi}(\theta), y^t - x^* \rangle + \|\delta^t - \gamma \nabla f_{\xi}(y^t + \delta^t) + \gamma \lambda \nabla f_{\xi}(\theta)\|^2. \end{aligned}$$

699 Taking conditional expectation  $\mathbb{E}_t := \mathbb{E}[\cdot \mid y^t]$ , we get

$$\begin{aligned}
& \mathbb{E}_t \left[ \|y^{t+1} - x^*\|^2 \right] \\
&= \|y^t - x^*\|^2 + 2\gamma \langle \mathbb{E}_t [\nabla f(y^t + \delta^t)] - \lambda \nabla f(\theta), x^* - y^t \rangle + \mathbb{E}_t \left[ \|\delta^t - \gamma \nabla f_\xi(y^t + \delta^t) + \gamma \lambda \nabla f_\xi(\theta)\|^2 \right] \\
&\stackrel{(44)}{\leq} \|y^t - x^*\|^2 + 2\gamma \left[ f(x^*) - f(y^t) - \frac{\mu}{2} \|y^t - x^*\|^2 + \frac{L - \mu}{2} \mathbb{E}_t \|\delta^t\|^2 \right] + 2\gamma \lambda \langle \nabla f(\theta), y^t - x^* \rangle \\
&\quad + \gamma^2 \mathbb{E}_t \left\| \frac{\delta^t}{\gamma} - \nabla f_\xi(y^t + \delta^t) + \lambda \nabla f_\xi(\theta) \right\|^2 \\
&= (1 - \gamma\mu) \|y^t - x^*\|^2 - 2\gamma(f(y^t) - f(x^*)) + \gamma(L - \mu) \mathbb{E}_t \|\delta^t\|^2 + 2\gamma \lambda \langle \nabla f(\theta), y^t - x^* \rangle \\
&\quad + \gamma^2 \mathbb{E}_t \left\| \frac{\delta^t}{\gamma} - \nabla f_\xi(y^t + \delta^t) + \lambda \nabla f_\xi(\theta) \right\|^2 \\
&\stackrel{(27)+(23)}{\leq} (1 - \gamma\mu) \|y^t - x^*\|^2 - \gamma(f(y^t) - f(x^*)) - \frac{\gamma\mu}{2} \|y^t - x^*\|^2 + \gamma(L - \mu) \mathbb{E}_t \|\delta^t\|^2 \\
&\quad + \frac{\gamma\mu}{2} \|y^t - x^*\|^2 + \frac{2\gamma\lambda^2}{\mu} \|\nabla f(\theta)\|^2 + \gamma^2 \mathbb{E}_t \left\| \frac{\delta^t}{\gamma} - \nabla f_\xi(y^t + \delta^t) + \lambda \nabla f_\xi(\theta) \right\|^2 \\
&\stackrel{(45)}{\leq} (1 - \gamma\mu) \|y^t - x^*\|^2 - \gamma(f(y^t) - f(x^*)) + \gamma(L - \mu) \mathbb{E}_t \|\delta^t\|^2 + \frac{2\gamma\lambda^2}{\mu} \|\nabla f(\theta)\|^2 \\
&\quad + 4\gamma^2 A(f(y^t) - f(x^*)) + 2\gamma^2 B + 4\gamma^2 \mathbb{E} \|\nabla f_\xi(x^*) - \lambda \nabla f_\xi(\theta)\|^2 \\
&= (1 - \gamma\mu) \|y^t - x^*\|^2 + \gamma(4\gamma A - 1)(f(y^t) - f(x^*)) + 2\gamma^2 B + \gamma(L - \mu) \mathbb{E}_t \|\delta^t\|^2 \\
&\quad + \frac{2\gamma\lambda^2}{\mu} \|\nabla f(\theta)\|^2 + 4\gamma^2 \mathbb{E} \|\nabla f_\xi(x^*) - \lambda \nabla f_\xi(\theta)\|^2 \\
&\stackrel{(40)}{\leq} (1 - \gamma\mu) \|y^t - x^*\|^2 + \gamma(4\gamma A - 1)(f(y^t) - f(x^*)) + 2\gamma^2 B \\
&\quad + \gamma(L - \mu) (2\alpha(f(x_k) - f(x_*)) + \nu) \\
&\quad + \frac{2\gamma\lambda^2}{\mu} \|\nabla f(\theta)\|^2 + 4\gamma^2 \mathbb{E} \|\nabla f_\xi(x^*) - \lambda \nabla f_\xi(\theta)\|^2 \\
&= (1 - \gamma\mu) \|y^t - x^*\|^2 + \gamma(4\gamma A + 2\alpha(L - \mu) - 1)(f(y^t) - f(x^*)) + 2\gamma^2 B + \gamma(L - \mu)\nu \\
&\quad + \frac{2\gamma\lambda^2}{\mu} \|\nabla f(\theta)\|^2 + 4\gamma^2 \mathbb{E} \|\nabla f_\xi(x^*) - \lambda \nabla f_\xi(\theta)\|^2,
\end{aligned}$$

700 where  $\alpha$  and  $\nu$  are as in Lemma 2 and  $A$  and  $B$  are defined Lemma 6. Next, we show that the bounds  
701 on  $\gamma$  and  $\omega$  lead to  $2\gamma A + \alpha(L - \mu) \leq 1/2$ . Plugging the expression of  $A$ , we the former inequality  
702 becomes

$$2\gamma \left( 2\mathcal{L} + \left( \mathcal{L}^2 + \frac{1}{\gamma^2} \right) \alpha \right) + \alpha(L - \mu) \leq \frac{1}{2}.$$

703 Rearranging terms, we get

$$\frac{2\omega}{\mu} = \alpha \leq \frac{1/2 - 4\gamma\mathcal{L}}{2\gamma\mathcal{L}^2 + \frac{2}{\gamma} + L - \mu}.$$

For  $\gamma \leq \frac{1}{16\mathcal{L}}$ , the above inequality holds if  $\omega = \mathcal{O}(\gamma\mu)$ . If  $\gamma = \frac{1}{16\mathcal{L}}$ , the condition on variance  
parameter  $\omega$  becomes  $\omega = \mathcal{O}(\mu/\mathcal{L})$ . Thus, by assumption on  $\omega$  and  $\gamma$ , we have  $2\gamma A + \alpha(L - \mu) \leq 1/2$ ,  
and hence

$$\mathbb{E}_t \left[ \|y^{t+1} - x^*\|^2 \right] \leq (1 - \gamma\mu) \|y^t - x^*\|^2 + D,$$

704 where

$$\begin{aligned}
D &= 2\gamma^2 B + \gamma(L - \mu)\nu + \frac{2\gamma\lambda^2}{\mu} \|\nabla f(\theta)\|^2 + 4\gamma^2 \mathbb{E} \|\nabla f_\xi(x^*) - \lambda \nabla f_\xi(\theta)\|^2 \\
&= 2\gamma^2 B + \gamma(L - \mu)\nu + \frac{2\gamma}{\mu} N_3(\lambda),
\end{aligned}$$

with  $N_3(\lambda) = \lambda^2 \|\nabla f(\theta)\|^2 + 2\gamma\mu\mathbb{E}\|\nabla f_\xi(x^*) - \lambda\nabla f_\xi(\theta)\|^2$ . Applying Lemma 1 with  $c = 2\mu$  we get  $N_3(\lambda^*) = N_3(0) \min\left(1, \frac{1}{\gamma}\mathcal{O}(f(\theta) - f^*)\right) = 2\mu\sigma_*^2 \min(\gamma, \mathcal{O}(f(\theta) - f^*))$ . Taking expectation, unrolling the recurrence, and applying the tower property, we get

$$\mathbb{E} \left[ \|y^t - x^*\|^2 \right] \leq (1 - \gamma\mu)^t \|y^0 - x^*\|^2 + \frac{D}{\gamma\mu}$$

where the neighborhood is given by

$$\begin{aligned} \frac{D}{\gamma\mu} &= \frac{1}{\gamma\mu}(2\gamma^2 B + \gamma(L - \mu)\nu + \frac{2\gamma}{\mu}N(\lambda^*)) = \frac{1}{\gamma\mu}(2\gamma^2(\mathcal{L}^2 + 1/\gamma^2)\nu + \gamma(L - \mu)\nu + \frac{2\gamma}{\mu}N(\lambda^*)) \\ &= \frac{\nu}{\mu}(2\gamma\mathcal{L}^2 + 2/\gamma + L - \mu) + \frac{2}{\mu^2}N(\lambda^*) = \frac{\nu}{\mu}(2\gamma\mathcal{L}^2 + 2/\gamma + L - \mu) + \frac{4\sigma_*^2}{\mu} \min(\gamma, \mathcal{O}(f(\theta) - f^*)). \end{aligned}$$

Ignoring the absolute constants and using bounds  $\gamma \leq \frac{1}{16\mathcal{L}}$  and  $\omega = \mathcal{O}(\gamma\mu)$ , we have

$$\mathbb{E} \left[ \|y^t - x^*\|^2 \right] \leq (1 - \gamma\mu)^t \|x^0 - x^*\|^2 + \mathcal{O} \left( \frac{\omega}{\gamma\mu} \|x^*\|^2 \right) + \frac{4\sigma_*^2}{\mu} \min(\gamma, \mathcal{O}(f(\theta) - f^*)).$$

Applying this inequality in (38) we conclude the proof.<sup>2</sup>

## F Additional Experimental Validation

In this section we provide additional experimental validation for our theory.

### F.1 The impact of the learning hyperparameters

We begin by measuring the impact that the optimization parameters, in particular the step size, have on the convergence of SGD and KD. For this, we perform experiments on linear models trained on the MNIST dataset, without momentum and regularization, using a mini-batch size of 10, for a total of 100 epochs. We compute the cross entropy train loss between the student and true labels, measured as a running average over all iterations within an epoch, similar to Figure 2. We also compute the minimum train loss, as well as the average and standard deviation across the last 10 epochs. The results in Figure 4a show the impact that different learning rates have on the overall training dynamics of self-distillation. In all cases, the teacher was trained using the same hyperparameters as the self-distilled models ( $\lambda = 0$  in the plot). We can see that using a higher learning rate introduces more variance in the SGD update, and KD would have a more pronounced variance reduction effect. In all cases, however, we can find an optimum  $\lambda$  achieving a lower train loss compared to SGD.

### F.2 The impact of the teacher’s quality

Next, we quantify the impact that a better trained teacher could have on self-distillation. Using the same setup of convex MNIST as above, we perform self-distillation using a better teacher, i.e. one that achieves 93.7% train accuracy and 92.5% test accuracy. (In comparison, the teacher trained using a step size of 0.05 achieved 92% train accuracy and 90.9% test accuracy) We can see in Figure 4b that this better-trained teacher has a more substantial impact on the models which inherently have higher variance, i.e. those trained with a higher learning rate; in this case, the optimal value of  $\lambda$  is closer to 1, which is also suggested by the theory (see Equation 14). We note that a similar behavior was also observed on the CIFAR-10 features linear classification task presented in Figure 2b.

### F.3 The impact of knowledge distillation on compression

Now we turn our attention towards validating the theoretical results developed in the context of knowledge distillation for compressed models, presented in Section 6. We consider again the convex MNIST setting, as described in the previous section, and we perform self-distillation from the better trained teacher. We prune the weights at initialization, using a random mask at a chosen sparsity level,

<sup>2</sup>The rate in Theorem 4 uses  $\gamma = \frac{1}{16\mathcal{L}}$  value for the learning rate.

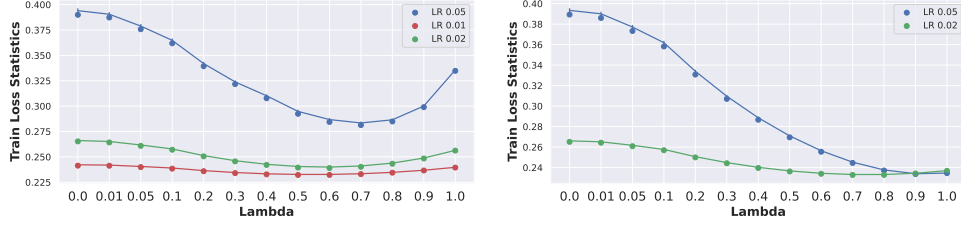

(a) The impact of the step size on the learning dynamics of SGD and KD. The teacher was trained with the same hyperparameters as the corresponding self-distilled models. (b) The impact of a better teacher on the learning dynamics of self-distillation. The same teacher was used in both setups.

Figure 4: Ablation study on the training loss of self-distillation and SGD, when taking into account the training hyperparameters (learning rate) and quality of the teacher.

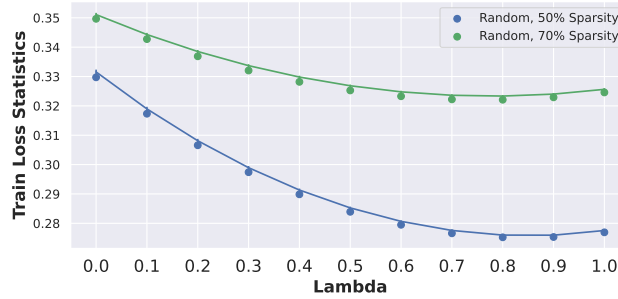

Figure 5: The impact of self-distillation on the train loss of compressed models. Here a random mask is computed at initialization, and kept fixed throughout training.

and we apply this fixed mask after each parameter update. The results presented in Figure 5 show that self-distillation can indeed reduce the train loss, compared to SGD, even for compressed updates. Moreover, we observe that with increased sparsity the impact of self-distillation is less pronounced, as also suggested by the theory.

## G Limitations

Lastly, we discuss some limitations of our work and possible workarounds.

- As we mentioned in the main part, our Proposition 1 does not hold precisely for arbitrary deep non-linear neural networks. However, we showed that this simple model (5) of distillation gradient approximates the true distillation gradient reasonably well both empirically (see Figure 1) and analytically (see Appendix B.3). Following our discussion from Section 7, one may construct more complex models for distillation gradient and discover further relations with other variance reduction techniques.
- As a theoretical paper, we used several assumptions to make our claims rigorous. However, one can always question each assumption and extend the theory under certain relaxations. Our theoretical claims are based on strong (quasi) convexity or Polyak-Łojasiewicz condition, which are standard assumptions in the optimization literature.
- Another limitation concerning the “distillation for compression” part of our theory is the unbiasedness condition  $\mathbb{E}[\mathcal{C}(x)] = x$  in Assumption 4. Ideally, we would utilize any “biased” compression operator, such as TopK, with similar convergence properties. However, it is known that biased estimators (e.g., biased compression operators or biased stochastic gradients) are harder to analyze in theory.
